# Supplementary material for: Soil Health Management Drives Soil Organic Matter More Than Edaphic Properties Across Working Organic Farms
Source: Copernicus journal article supplement (doi:10.5194/egusphere-2025-3440), 2025-09-03
Supplement: Supplementary file 1 [file egusphere-2025-3440-supplement.pdf]

## Supplemental Information

### S1 Supplemental Methods

#### *Cover crop functional richness*

The USDA defines six major functional groups for cover crops: cool season grasses, cool season legumes, cool season broadleaves, warm season grasses, warm season legumes, and warm season broadleaves. The benefits from these groups are considered for different seasonal niches, and including a broader range of functional groups is believed to provide complementary benefits (USDA-NRCS, 2019).

#### *Microbial biomass carbon and nitrogen*

Microbial biomass C and N were determined via the direct fumigation method as described in Setia et al. (2012). Briefly, two subsamples per were divided into two falcon tubes with 16.67g soil. To one of the falcon tubes, 2.08 ml of ethanol free chloroform was added and to both falcon tubes, 40 ml of 0.5M K<sub>2</sub>SO<sub>4</sub> was added. Samples were shaken for 30 minutes, centrifuged, filtered and the supernatant was bubbled for one hour to remove chloroform. Samples were analyzed for C and N on an elemental analyzer (VarioTOC Cube©, Elementar ).

#### *References*

Setia, R., Verma, S. L., & Marschner, P. (2012). Measuring microbial biomass carbon by direct extraction–comparison with chloroform fumigation-extraction. *European journal of soil biology*, 53, 103-106.

USDA Natural Resources Conservation Service. (2019). Considerations for Building Cover Crop Mixtures. Jimmy Carter Plant Materials Center Technical Note.

S2 Supplemental Figures

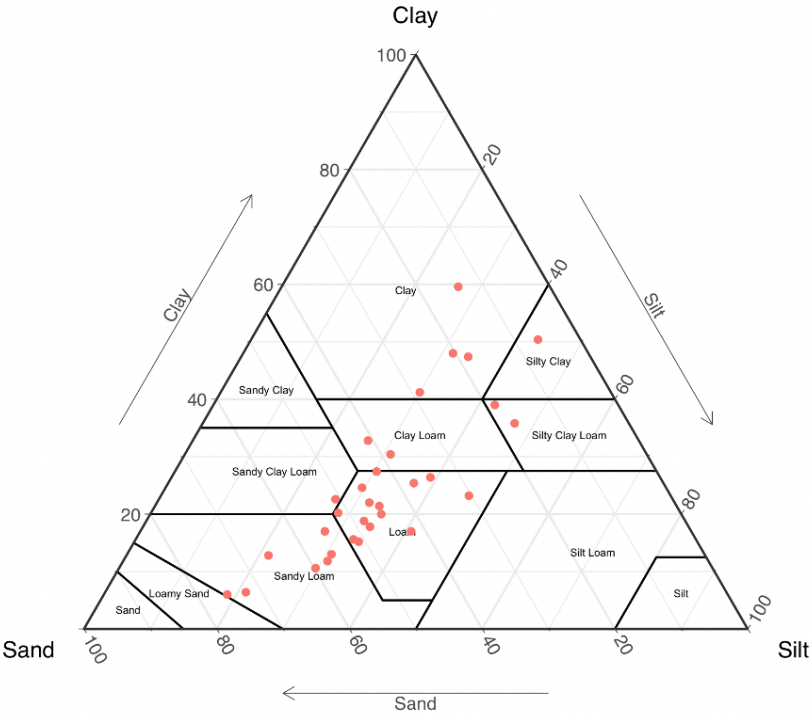

Figure S1: Soil texture across the 28 field sites (red circles).

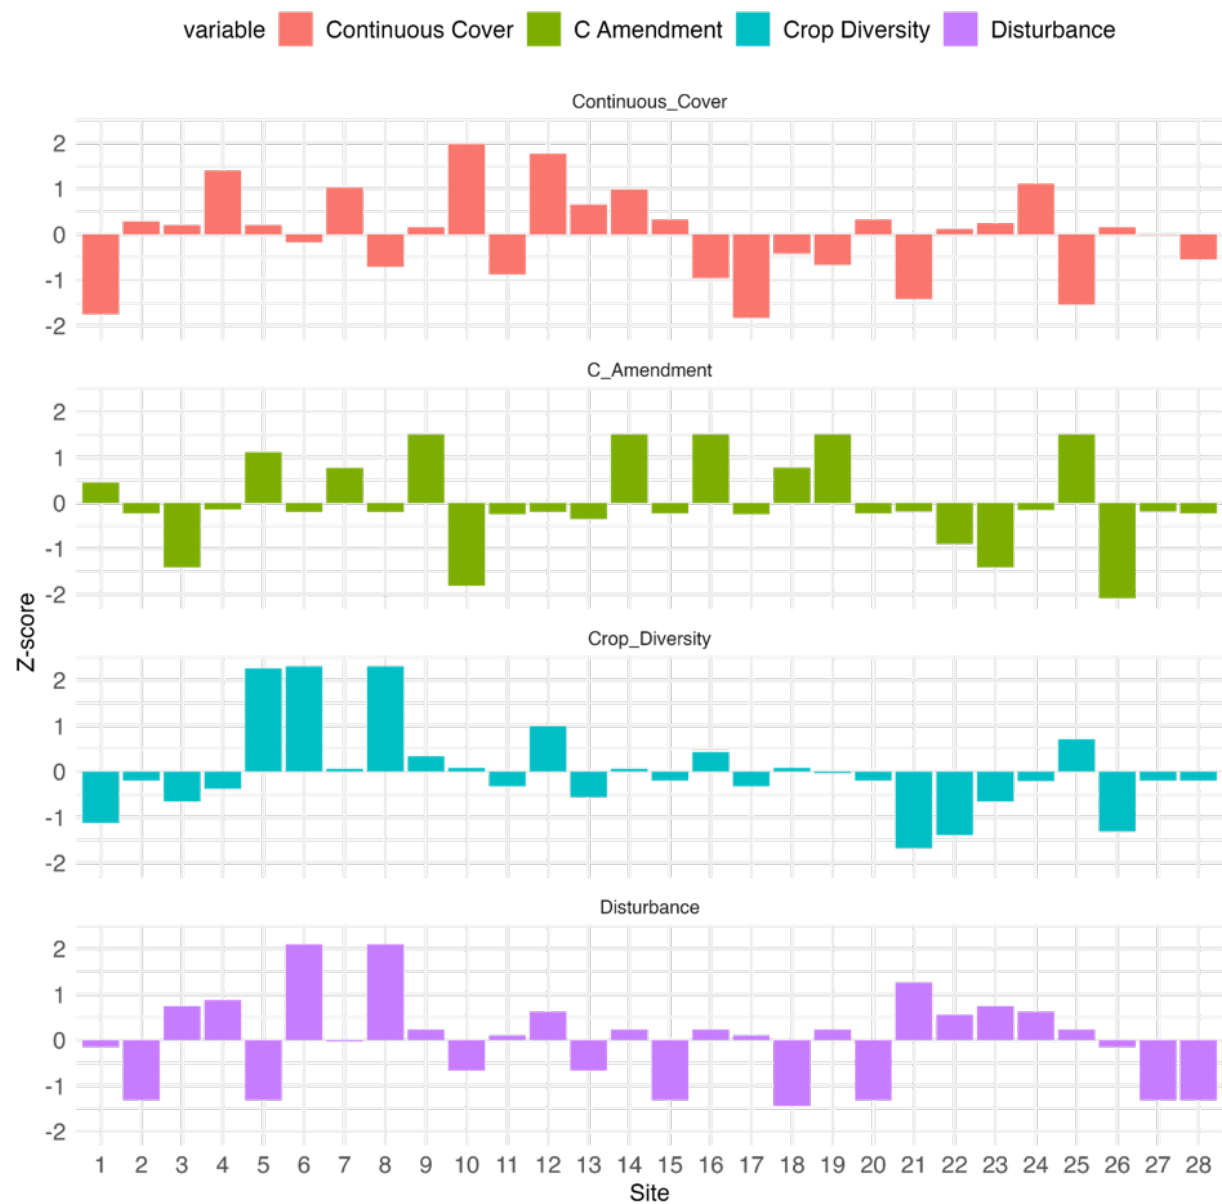

Figure S2: Scaled management Z-scores across 28 field sites, ordered by degree of soil health practice utilization. Higher values indicate higher utilization of a given practice.

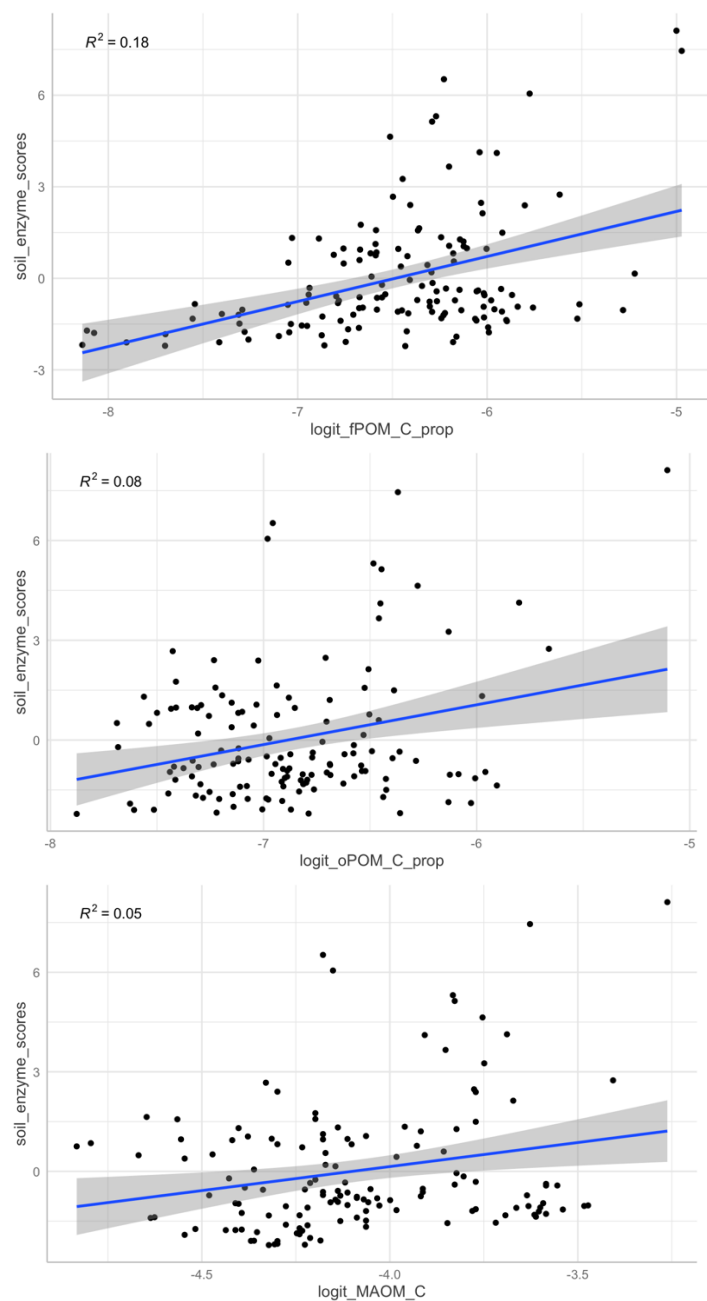

Figure S3: Bivariate relationships between fraction variables and soil enzyme scores (PC1 - Hydrolytic enzymes PHO, BG, NAG have largest contributions). Positive correlation is clearest for fPOM, while oPOM and MAOM are less clear.

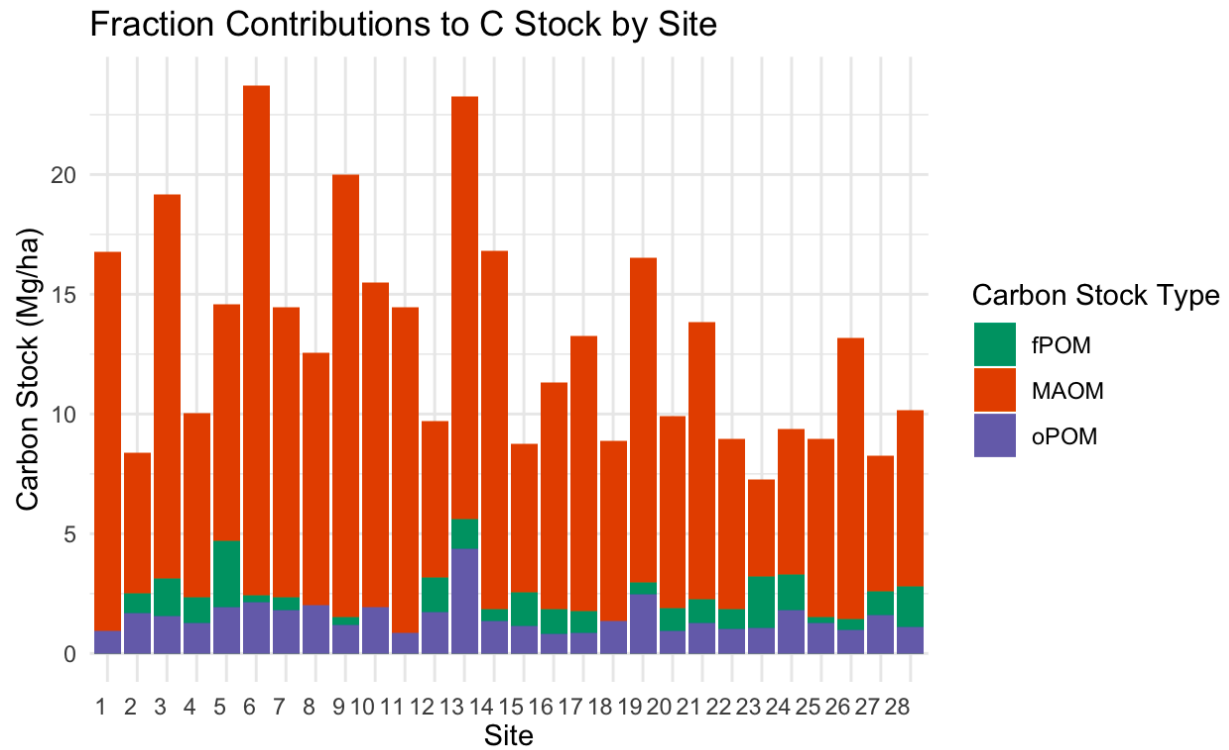

Figure S4: Fraction Contributions to C Stocks by site. Relative contributions of fPOM, oPOM, and MAOM to total carbon stock, estimated to 10 cm depth across one hectare.

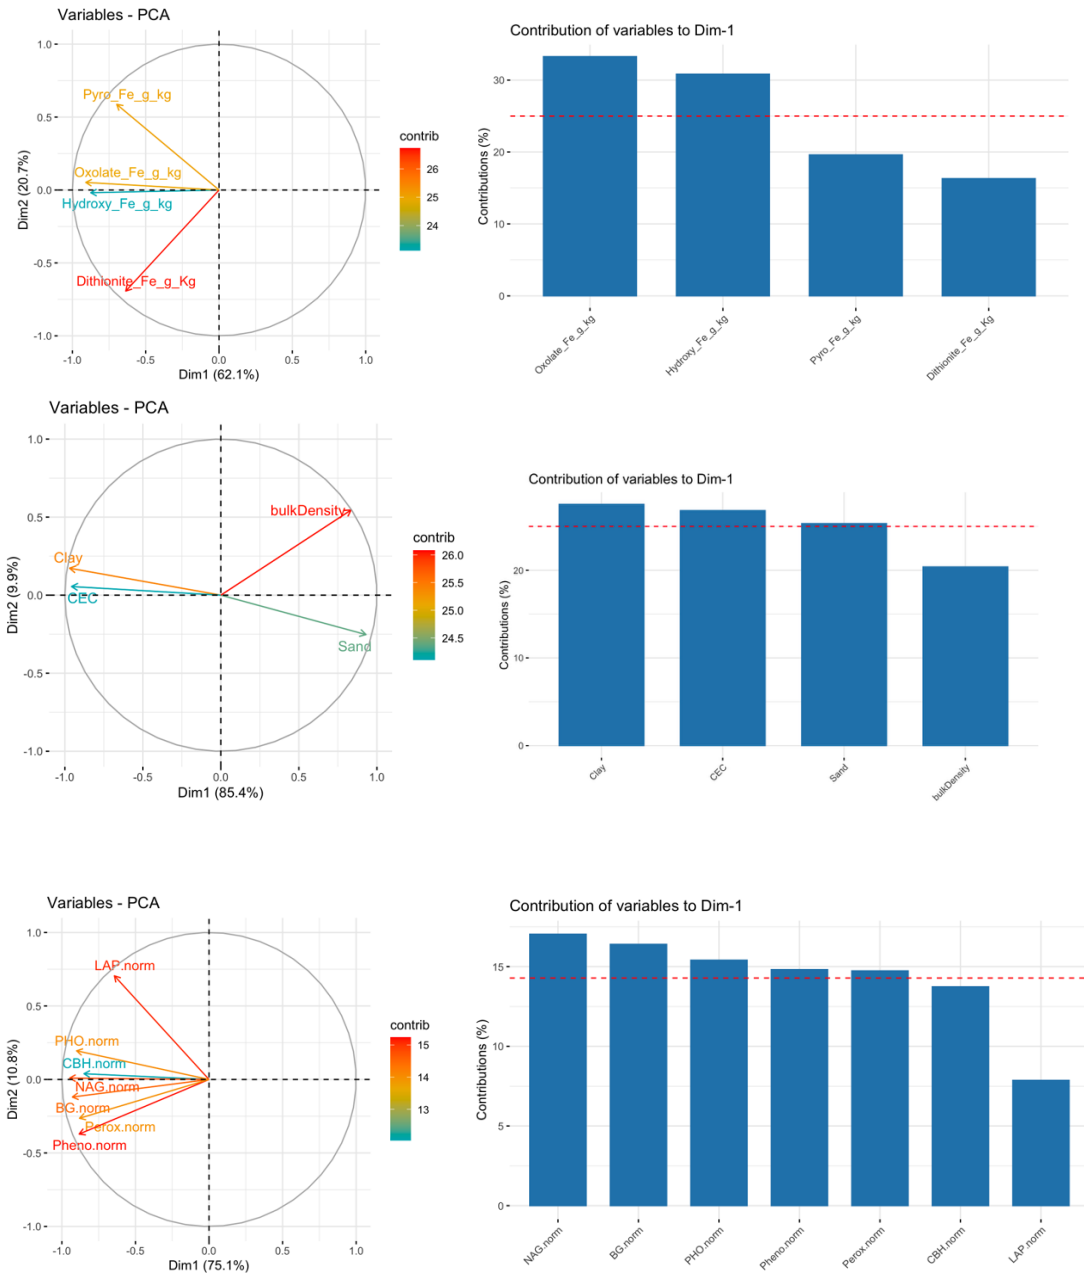

Figure S5: Principal component axes utilized for mixed models. Physical, Iron, and Extracellular Enzyme variable reduction.

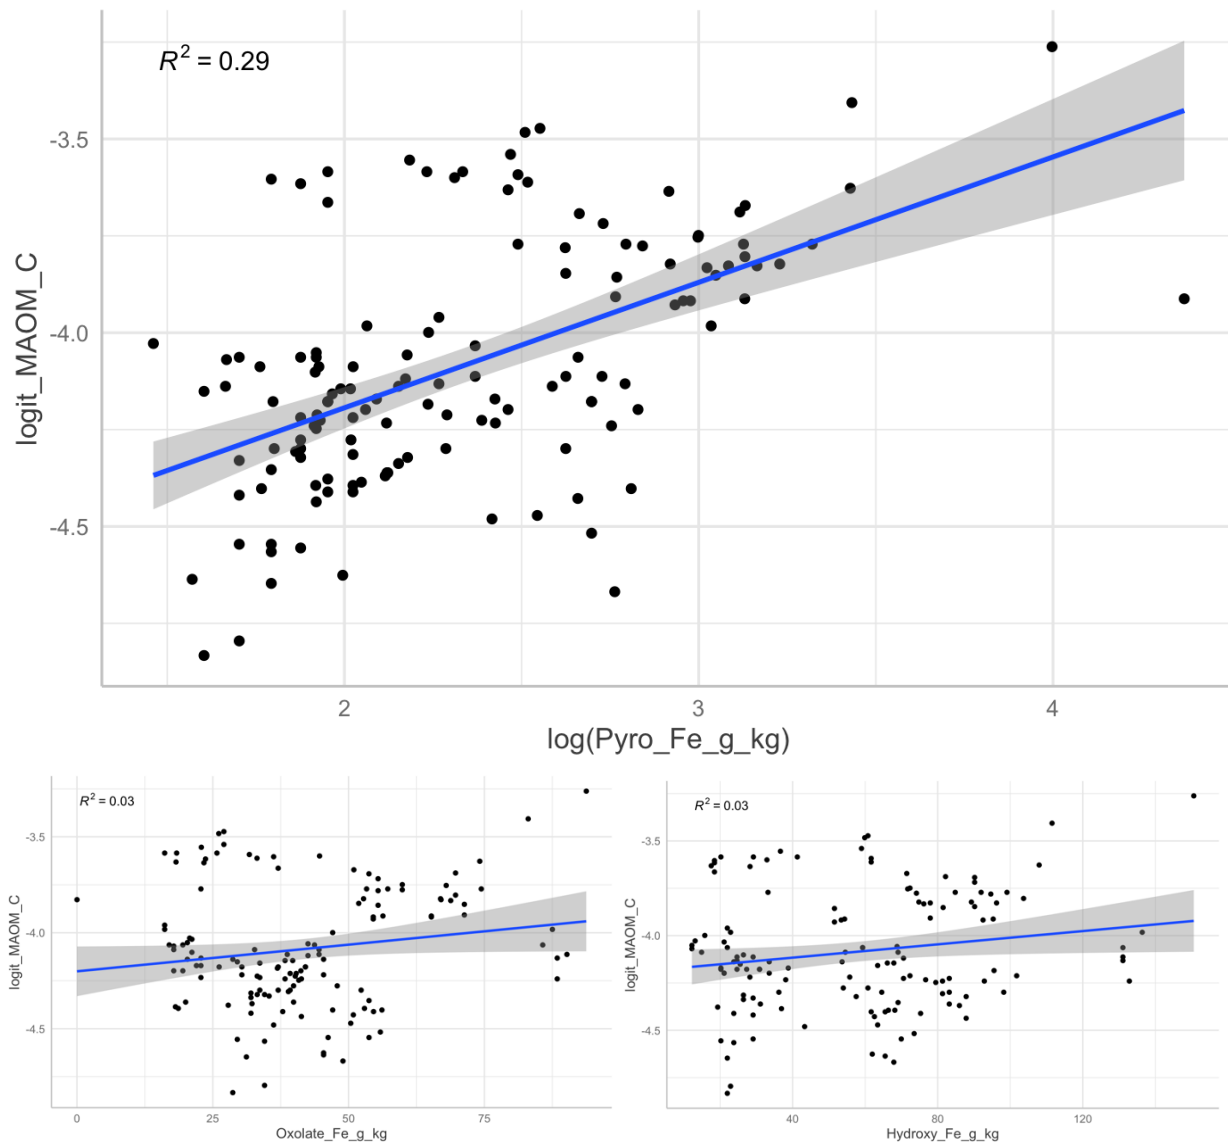

Figure S6: Soil Iron Fractions and MAOM C% (logit transformed). Pyrophosphate is log transformed to better display relationships given a larger spread of values.

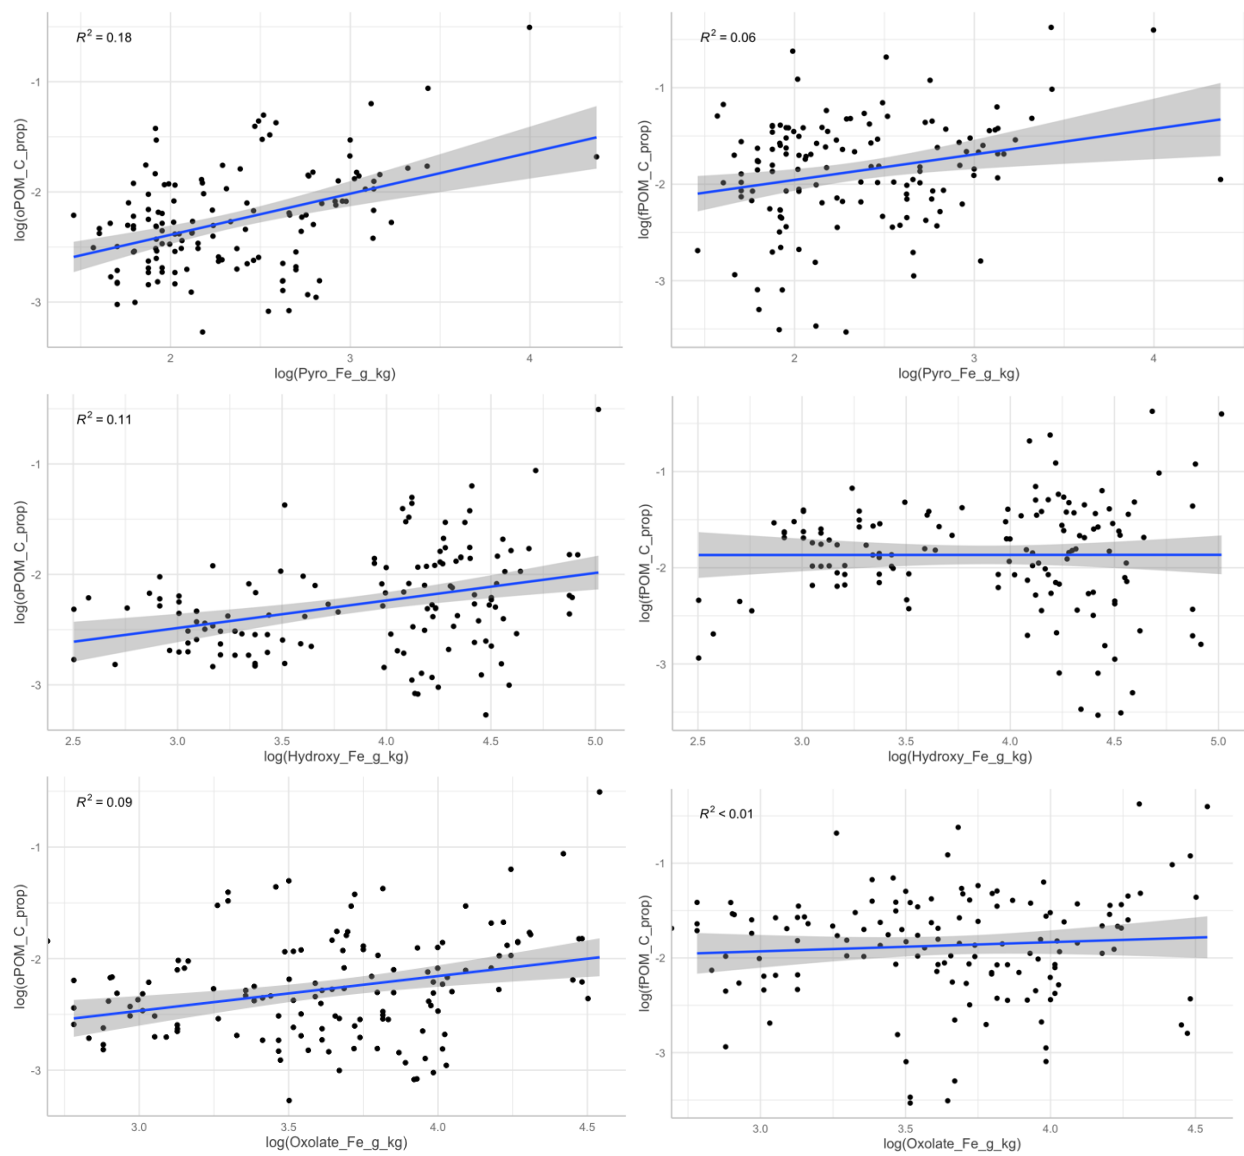

Figure S7: oPOM (left) and fPOM (right) plotted against three iron fractions



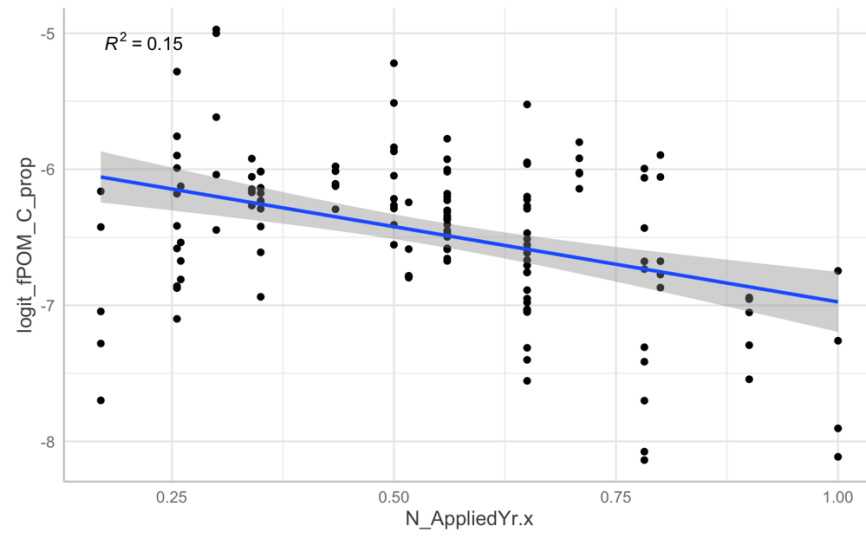

Figure S8: fPOM decreasing with increased nitrogen input

### S3 Supplemental Tables

| Site ID | Series                      | Sand (%) | Clay (%) | Silt (%) | CEC (Meq 100 g <sup>-1</sup> ) | pH   | Dominant Order |
|---------|-----------------------------|----------|----------|----------|--------------------------------|------|----------------|
| 1       | Sorrento                    | 6.4      | 50.4     | 43.2     | 32.6                           | 7.44 | Mollisols      |
| 2       | Salinas                     | 40.8     | 32.8     | 26.4     | 27.3                           | 7.52 | Mollisols      |
| 3       | Riverwash                   | 37.6     | 25.4     | 37       | 20.38                          | 7.74 | Mollisols      |
| 4       | Sorrento                    | 30.4     | 23.2     | 46.4     | 23.36                          | 8.24 | Mollisols      |
| 5       | Sorrento                    | 20.4     | 48       | 31.6     | 43.52                          | 7.8  | Mollisols      |
| 6       | Chualar                     | 55.2     | 17       | 27.8     | 11.06                          | 7.82 | Mollisols      |
| 7       | Chualar                     | 72.4     | 6.4      | 21.2     | 12.06                          | 7.68 | Mollisols      |
| 8       | Sorrento                    | 18.4     | 47.4     | 34.2     | 36.64                          | 7.44 | Mollisols      |
| 9       | Arnold                      | 34.6     | 26.4     | 39       | 21.08                          | 6.98 | Entisols       |
| 10      | Pinto                       | 48       | 17.8     | 34.2     | 14.7                           | 7.32 | Mollisols      |
| 11      | Danville                    | 45.8     | 24.6     | 29.6     | 24.12                          | 6.72 | Mollisols      |
| 12      | Tierra-Watsonville          | 38.6     | 30.4     | 31       | 26.82                          | 7.52 | Alfisols       |
| 13      | Clear Lake                  | 13.8     | 59.6     | 26.6     | 43.04                          | 6.96 | Vertisols      |
| 14      | Chualar                     | 56.2     | 13       | 30.8     | 10.2                           | 7.7  | Mollisols      |
| 15      | Corducci-Typic Xerofluvents | 51       | 15.2     | 33.8     | 13.24                          | 7.72 | Entisols       |
| 16      | Watsonville                 | 42.2     | 27.4     | 30.4     | 19.04                          | 7.54 | Mollisols      |
| 17      | Pacheco                     | 28.8     | 41.2     | 30       | 28.78                          | 7.86 | Mollisols      |
| 18      | Conejo                      | 46       | 22       | 32       | 19.5                           | 7.1  | Mollisols      |
| 19      | Chualar                     | 65.8     | 12.8     | 21.4     | 8.34                           | 8.06 | Mollisols      |
| 20      | Placentia                   | 44.8     | 21.4     | 33.8     | 16.1                           | 7.42 | Alfisols       |
| 21      | Pinto                       | 51.6     | 20.2     | 28.2     | 11.28                          | 6.54 | Mollisols      |
| 22      | Mocho                       | 17.2     | 35.8     | 47       | 25.2                           | 8.26 | Mollisols      |
| 23      | Gloria                      | 42.2     | 17       | 40.8     | 12.44                          | 7.34 | Alfisols       |
| 24      | Placentia                   | 45.2     | 20       | 34.8     | 15.02                          | 7.08 | Alfisols       |
| 25      | Sorrento                    | 18.6     | 39       | 42.4     | 25                             | 8.06 | Mollisols      |
| 26      | Elder                       | 57.4     | 11.8     | 30.8     | 11.84                          | 6.68 | Mollisols      |
| 27      | San Andreas-Santa Ynez      | 59.8     | 10.6     | 29.6     | 8.44                           | 7.7  | Mollisols      |
| 28      | Hanford                     | 75.4     | 6        | 18.6     | 8.1                            | 7.8  | Entisols       |

Table S1: Site-level texture, CEC, pH, order and series data from lab analysis and SSURGO

| Variable                               | Min   | Median | Mean  | Max   |
|----------------------------------------|-------|--------|-------|-------|
| Clay (%)                               | 5     | 23     | 26    | 60    |
| Sand (%)                               | 5     | 43     | 42    | 77    |
| Silt (%)                               | 18    | 32     | 33    | 49    |
| CEC (meq 100g <sup>-1</sup> )          | 7.4   | 18.8   | 20.3  | 52.1  |
| pH                                     | 6.4   | 7.5    | 7.5   | 8.4   |
| BD (g cm <sup>-3</sup> )               | 0.88  | 1.34   | 1.33  | 1.60  |
| TC (%)                                 | 0.74  | 1.39   | 1.50  | 3.95  |
| Surface C Stock (Mg ha <sup>-1</sup> ) | 23.27 | 29.26  | 33.30 | 67.69 |
| SOM (%)                                | 1     | 2.15   | 2.36  | 6.8   |
| MAOM C%                                | 0.79  | 1.57   | 1.73  | 3.69  |
| fPOM C%                                | 5.73  | 29.59  | 29.53 | 43.60 |
| oPOM C%                                | 0.08  | 0.29   | 0.87  | 10.49 |

Table S2: Summary statistics across 28 field sites for surface soil (0-15 cm) texture, pH, and carbon values.

|                                | MAOM C (%)                            |                                     | free POM C<br>(% total C)            |                                       | oPOM C<br>(% total C)                | Carbon Stock<br>(0-15cm)                            |
|--------------------------------|---------------------------------------|-------------------------------------|--------------------------------------|---------------------------------------|--------------------------------------|-----------------------------------------------------|
| Model Name                     | MAOM1                                 | MAOM 2                              | fPOM1                                | fPOM2                                 | oPOM                                 | Bulk                                                |
| Intercept                      | -4.08 ± 0.05<br>(1.17e-10)            | -4.08 ± 0.05<br>(1.49e-11)          | -6.48 ± 0.079<br>(1.19e-06)          | -6.475 ±<br>0.067 (<2e-<br>16)        | -6.87 ±<br>0.063<br>(6.08e-4)        | 1.058 ± 0.0033<br>(5.48e-11)                        |
| <i>Management</i>              |                                       |                                     |                                      |                                       |                                      |                                                     |
| Continuous<br>coverage         | 0.20 ± 0.199<br>(0.106)               | <b>0.22 ± 0.12</b><br><b>(0.07)</b> | 0.18 ± 0.19<br>(0.37)                |                                       | 0.14 ± 0.15<br>(0.38)                | 0.015<br>± 0.0076<br>(0.068)                        |
| 5 yr cover<br>proportion       |                                       |                                     |                                      | <b>0.46 ± 0.18</b><br><b>(0.017)</b>  |                                      |                                                     |
| Reduced<br>disturbance         | <b>0.21 ± 0.117</b><br><b>(0.09)</b>  | <b>0.21 ± 0.11</b><br><b>(0.07)</b> | 0.033 ± 0.17<br>(0.84)               |                                       | 0.10 ± 0.14<br>(0.47)                | 0.0005 ±<br>0.0072 (0.95)                           |
| Deep tillage<br>frequency      |                                       |                                     |                                      | <b>-0.40 ± 0.16</b><br><b>(0.022)</b> |                                      |                                                     |
| Crop diversity                 | 0.11 ± 0.12<br>(0.37)                 | 0.11 ± 0.12<br>(0.37)               | <b>0.34 ± 0.19</b><br><b>(0.083)</b> | 0.05 ± 1.84<br>(0.79)                 | <b>0.36 ± 0.15</b><br><b>(0.024)</b> | 0.0066 ± 0.077<br>(0.40)                            |
| <i>Edaphic</i>                 |                                       |                                     |                                      |                                       |                                      |                                                     |
| Iron                           | <b>0.13 ± 0.05</b><br><b>(0.02)</b>   | <b>0.10 ± 0.06</b><br><b>(0.07)</b> | <b>0.33 ± 0.16</b><br><b>(0.045)</b> | 0.23 ± 0.15<br>(0.13)                 | <b>0.40 ± 0.11</b><br><b>(0.001)</b> | 0.0061 ±<br>0.0043 (0.16)                           |
| pH                             | <b>-0.11 ± 0.061</b><br><b>(0.06)</b> | -0.07 ± 0.06<br>(0.21)              | -0.009 ±<br>0.145 (0.95)             | -0.014 ±<br>0.13 (0.92)               | -0.062 ±<br>0.11 (0.57)              | -0.0048 ±<br>0.0043 (0.27)                          |
| Soil physical<br>(Clay → Sand) | <b>0.19 ± 0.11</b><br><b>(0.07)</b>   | 0.14 ± 0.11<br>(0.18)               | 0.29 ± 0.20<br>(0.17)                | 0.011 ±<br>0.098 (0.91)               | 0.11 ± 0.16<br>(0.49)                | <b>-0.021 ±</b><br><b>0.0073</b><br><b>(0.0074)</b> |
| Enzymes                        |                                       | <b>0.10 ± 0.05</b><br><b>(0.04)</b> |                                      |                                       |                                      |                                                     |

Table S3: Summary of mixed-effects models. Standardized coefficient estimates with standard error are reported with p-values in parentheses. Standardization was performed following Gelman (2008) and allows for better comparison of variable effect sizes. Bolded values indicate significance level  $p < 0.1$ . Blank cells indicate that the variable was not included in a given model. MAOM C%, and fPOM and oPOM C<sub>prop</sub> were logit transformed, and C-stock was log transformed. Bulk C Stock model is Box-Cox transformed, hence the different scale of coefficients

| Variable                    | MAOM C (%)                             |                                        | free POM C (% total C)                |                                       | oPOM C (% total C)                    | Carbon Stock (0-10 cm)      |
|-----------------------------|----------------------------------------|----------------------------------------|---------------------------------------|---------------------------------------|---------------------------------------|-----------------------------|
| Model                       | MAOM1                                  | MAOM 2                                 | fPOM1                                 | fPOM2                                 | oPOM                                  | Bulk                        |
| Intercept                   | -3.23 ± 0.46<br>(1.17e-10)             | -3.501 ± 0.47<br>(1.49e-11)            | -6.476 ± 0.079 (1.19e-06)             | -6.475 ± 0.067 (<2e-16)               | -6.87 ± 0.064<br>(6.08e-4)            | 1.97 ± 0.47<br>(5.48e-11)   |
| Continuous Coverage         | 0.103 ± 0.061<br>(0.105)               | <b>0.11 ± 0.06</b><br><b>(0.073)</b>   | 0.087 ± 0.095<br>(0.37)               |                                       | 0.067 ± 0.075 (0.38)                  | 0.0073 ± 0.0038<br>(0.068)  |
| 5 yr Cover Proportion       |                                        |                                        |                                       | <b>0.23 ± 0.09</b><br><b>(0.017)</b>  |                                       |                             |
| Reduced Disturbance         | <b>0.103 ± 0.057</b><br><b>(0.085)</b> | <b>0.11 ± 0.056</b><br><b>(0.068)</b>  | 0.017 ± 0.087<br>(0.85)               |                                       | 0.051 ± 0.069 (0.47)                  | 0.0002 ± 0.036 (0.95)       |
| Deep Tillage Frequency      |                                        |                                        |                                       | <b>-0.20 ± 0.08</b><br><b>(0.022)</b> |                                       |                             |
| C amendment                 | 0.017 ± 0.064<br>(0.80)                | 0.022 ± 0.062 (0.72)                   | -0.13 ± 0.1<br>(0.21)                 | -0.039 ± 0.087<br>(0.66)              | -0.095 ± 0.079 (0.24)                 | 0.0009 ± 0.0040<br>(0.82)   |
| Crop Diversity              | 0.057 ± 0.061<br>(0.37)                | 0.055 ± 0.060 (0.37)                   | <b>0.17 ± 0.094</b><br><b>(0.083)</b> | 0.025 ± 0.092 (0.79)                  | <b>0.18 ± 0.074</b><br><b>(0.024)</b> | 0.0033 ± 0.0038 (0.40)      |
| Iron                        | <b>0.04 ± 0.029</b><br><b>(0.023)</b>  | <b>0.032 ± 0.017</b><br><b>(0.068)</b> | <b>0.16 ± 0.08</b><br><b>(0.045)</b>  | 0.12 ± 0.076<br>(0.13)                | <b>0.20 ± 0.059</b><br><b>(0.001)</b> | 0.0030 ± 0.0021 (0.16)      |
| pH                          | <b>-0.11 ± 0.061</b><br><b>(0.064)</b> | -0.078 ± 0.062 (0.21)                  | -0.004 ± 0.072 (0.95)                 | -0.007 ± 0.064 (0.92)                 | -0.031 ± 0.053 (0.57)                 | -0.0024 ± 0.0022 (0.27)     |
| Soil Physical (Clay < Sand) | <b>0.053 ± 0.029</b><br><b>(0.073)</b> | 0.039 ± 0.029 (0.18)                   | 0.14 ± 0.102<br>(0.17)                | 0.011 ± 0.098 (0.91)                  | 0.05 ± 0.078<br>(0.49)                | -0.010 ± 0.0036<br>(0.0074) |
| Enzymes                     |                                        | <b>0.025 ± 0.012</b><br><b>(0.042)</b> |                                       |                                       |                                       |                             |

Table S4: Summary of mixed-effects models. Unstandardized coefficient estimates with standard error are reported with p-values in parentheses. Bolded values are significant at p-values <0.1. Empty cells indicate that the variable was not included in a given model. MAOM C%, and fPOM and oPOM C<sub>prop</sub> were logit transformed, and C-stock was log transformed. Bulk C Stock model is Box-Cox transformed, hence the different scale of coefficients

|                        | MAOM C (%)                |                           | free POM C<br>(% total C) |                           | oPOM C<br>(% total C)    | Stock C                  |
|------------------------|---------------------------|---------------------------|---------------------------|---------------------------|--------------------------|--------------------------|
| Model name             | MAOM1                     | MAOM 2                    | fPOM1                     | fPOM2                     | oPOM                     | Bulk                     |
| Edaphic/Bio Variables* | 0.060<br>(0.00 -<br>0.38) | 0.081<br>(0.00 -<br>0.41) | 0.039<br>(0.00 -<br>0.31) | 0.030<br>(0.00 -<br>0.29) | 0.12<br>(0.00 -<br>0.40) | 0.25<br>(0.11 -<br>0.52) |
| Management Variables   | 0.19<br>(0.06 -<br>0.48)  | 0.20<br>(0.05 -<br>0.50)  | 0.12<br>(0.04 -<br>0.38)  | 0.25<br>(0.13 -<br>0.47)  | 0.17<br>(0.05- 0.44)     | 0.12<br>(0.00 -<br>0.41) |
| Full Model             | 0.30<br>(0.17 -<br>0.57)  | 0.32<br>(0.18 -<br>0.60)  | 0.18<br>(0.1 - 0.43)      | 0.31<br>(0.19 -<br>0.52)  | 0.29<br>(0.19 -<br>0.54) | 0.34<br>(0.19 -<br>0.60) |

Table S5: Marginal  $R^2$  values for edaphic variable groupings (Physical PC1 – texture, CEC, pH) and management variables (continuous cover, reduced disturbance, C input, crop diversity Z scores) with confidence intervals from bootstrapping.  $R^2$  values and confidence intervals obtained using ‘partR2’ package in R. CIs estimated via parametric bootstrapping with 1000 iterations.

\*For all models, this includes the soil physical PC1 (soil texture, CEC), soil iron PC1, and pH. For model MAOM2 this also includes enzyme activity PC1.

|                        | MAOM           |                |               | fPOM               |                |               | oPOM         |               |              |
|------------------------|----------------|----------------|---------------|--------------------|----------------|---------------|--------------|---------------|--------------|
| Test                   | 1              | 2              | 3             | 1                  | 2              | 3             | 1            | 2             | 3            |
| Intercept              | -4.08 ± 0.05   | -4.085 ± 0.049 | -4.08 ± 0.050 | -7.59081 ± 0.27848 | -7.41 ± 0.324  | -7.39 ± 0.99  | -6.87 ± 0.06 | -6.45 ± 0.83  | -6.87 ± 0.06 |
| Continuous Coverage    | 0.12 ± 0.06    | 0.11 ± 0.054   | 0.12 ± 0.054  | Not Included       | Not included   | Not included  | 0.11 ± 0.07  | 0.08 ± 0.07   | 0.11 ± 0.07  |
| Reduced Disturbance    | 0.1 ± 0.057    | 0.10 ± 0.052   | 0.11 ± 0.05   | Not Included       | Not included   | Not included  | 0.06 ± 0.07  | REMO VED      | REMO VED     |
| C amendment            | 0.039 ± 0.06   | REMO VED       | REMO VED      | REMO VED           | -0.037 ± 0.085 | -0.025 ± 0.07 | REMO VED     | -0.097 ± 0.07 | REMO VED     |
| Crop Diversity         | 0.04 ± 0.06    | 0.2529         | REMO VED      | -0.0087 ± 0.074    | 0.024 ± 0.09   | REMO VED      | 0.14 ± 0.06  | 0.19 ± 0.07   | 0.14 ± 0.06  |
| 5 yr Cover Proportion  | Not included   | Not included   | Not included  | 1.724 ± 0.469      | 1.40 ± 0.54    | 1.479 ± 0.42  | Not included | Not included  | Not included |
| Deep Tillage Frequency | Not included   | Not included   | Not included  | -0.495 ± 0.172     | -0.48 ± 0.19   | -0.51 ± 0.16  | Not included | Not included  | Not included |
| Iron                   | 0.35 ± 0.017   | 0.030 ± 0.17   | 0.029 ± 0.017 | REMO VED           | 0.07 ± 0.05    | 0.069 ± 0.038 | 0.12 ± 0.03  | 0.12 ± 0.03   | 0.11 ± 0.03  |
| pH                     | REMO VED       | REMO VED       | REMO VED      | REMO VED           | REMO VED       | -0.009 ± 0.13 | REMO VED     | -0.05 ± 0.11  | REMO VED     |
| Soil Physical          | 0.05175 ± 0.03 | 0.036 ± 0.028  | 0.035 ± 0.028 | -0.040 ± 0.0412    | 0.007 ± 0.05   | REMO VED      | 0.022 ± 0.04 | REMO VED      | 0.01 ± 0.04  |
| Enzymes                | Not included   | 0.030 ± 0.012  | REMO VED      | Not Included       | Not included   | Not included  | Not included | Not included  | Not included |

Table S6: Model sensitivity tests removing variables to ensure stable outcomes. Bolded values are significant at p<0.05 and italicized values represent p<0.1

## S4 Model Fit Checks

### MAOM Model 1

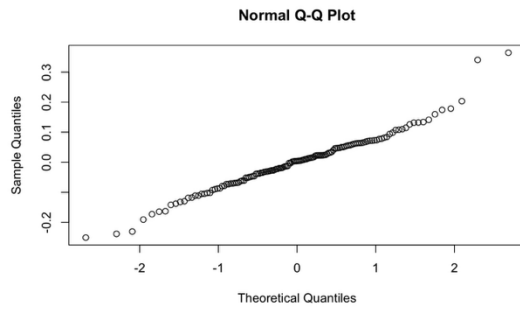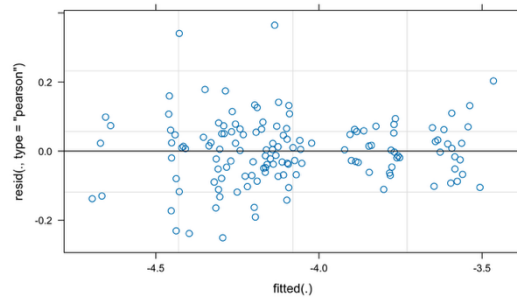

VIF:

| soil_phys_scores | soil_iron_scores | pH       | CoverCrop_Z_rem | Disturbance_Z |
|------------------|------------------|----------|-----------------|---------------|
| 1.360383         | 1.194374         | 1.063132 | 1.338636        | 1.162723      |
| CropDiv_Z        | Cinput_Z         |          |                 |               |
| 1.338195         | 1.450155         |          |                 |               |

### MAOM Model 2

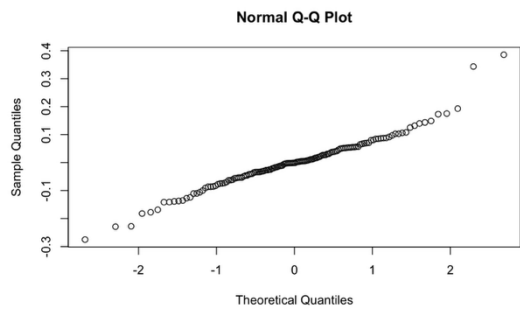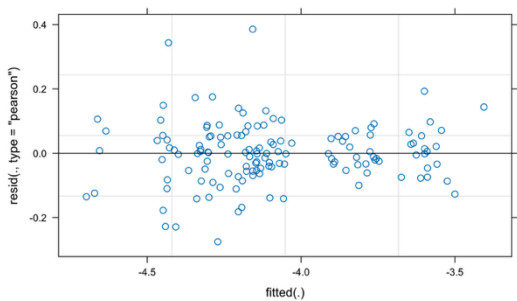

VIF:

| soil_phys_scores | soil_iron_scores | soil_enzyme_scores | pH       |
|------------------|------------------|--------------------|----------|
| 1.434775         | 1.252872         | 1.160380           | 1.152377 |
| CoverCrop_Z_rem  | Disturbance_Z    | CropDiv_Z          | Cinput_Z |
| 1.348097         | 1.165278         | 1.339506           | 1.455429 |

### fPOM Model 1

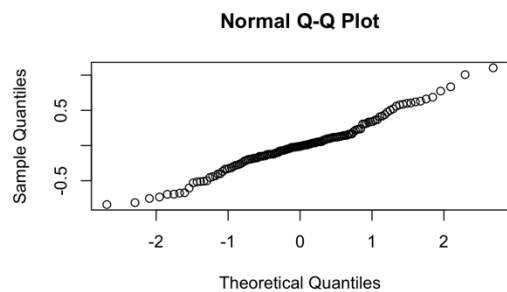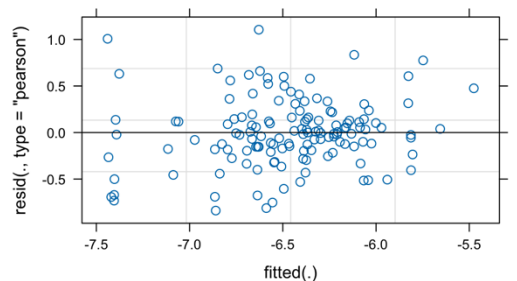

VIF:

| Soil phys scores | soil iron scores | pH       | CoverCrop_Z_rem | Disturbance_Z |
|------------------|------------------|----------|-----------------|---------------|
| 1.732324         | 1.493375         | 1.116042 | 1.478738        | 1.189019      |
| CropDiv_Z        | Cinput_Z         |          |                 |               |
| 1.395103         | 1.598201         |          |                 |               |



### fPOM Model 2

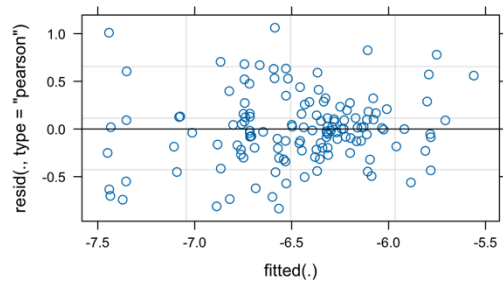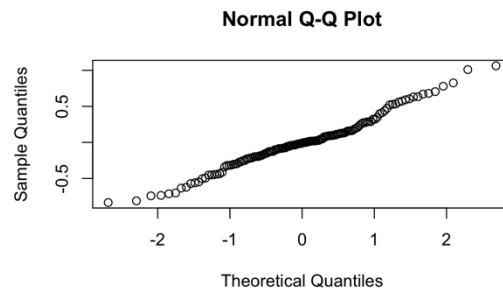

VIF:

| soil_phys_scores | soil_iron_scores | pH       | Prop5yr  | DeepTillageFreq | CropDiv_Z | Cinput_Z |
|------------------|------------------|----------|----------|-----------------|-----------|----------|
| 2.222199         | 1.681237         | 1.115935 | 1.824689 | 1.397168        |           |          |
| 1.868738         | 1.679382         |          |          |                 |           |          |

### oPOM Model

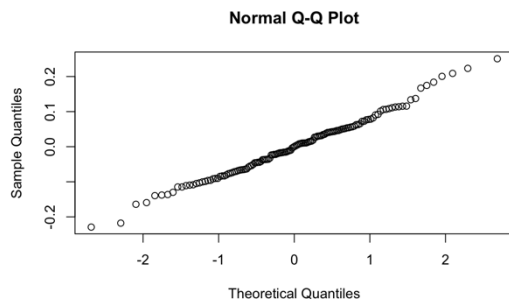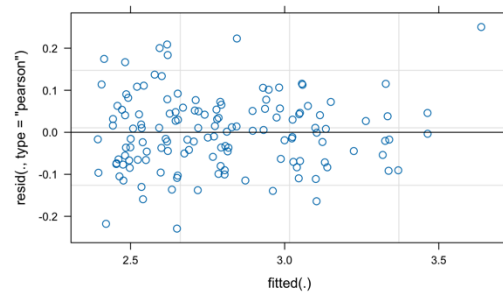

VIF:

| soil_phys_scores | soil_iron_scores | pH       | Prop5yr  | Disturbance_Z |
|------------------|------------------|----------|----------|---------------|
| 1.830358         | 1.295353         | 1.052876 | 1.596217 | 1.232987      |
| CropDiv_Z        | Cinput_Z         |          |          |               |
| 1.396249         | 1.326742         |          |          |               |

### C stock (bulk) Model

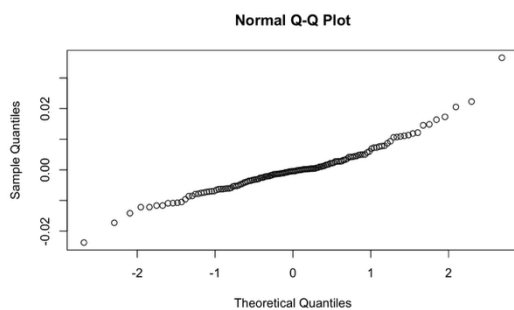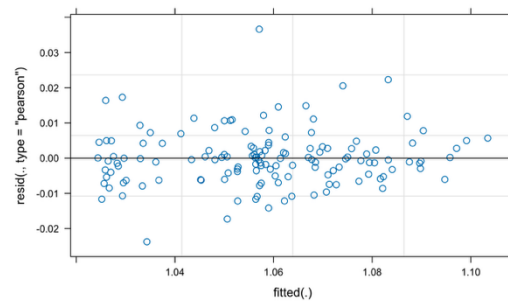

| soil_phys_scores | soil_iron_scores | pH       | CoverCrop_Z_rem | CropDiv_Z |
|------------------|------------------|----------|-----------------|-----------|
| 1.449288         | 1.246023         | 1.068774 | 1.379489        | 1.353208  |
| Disturbance_Z    | Cinput_Z         |          |                 |           |
| 1.172728         | 1.488132         |          |                 |           |

Carbon Stock model results with standard management z-scores:

$\log(\text{C\_fraction\_stock}) \sim \text{soil\_phys\_scores} + \text{soil\_iron\_scores} + \text{pH}$   
 $+ \text{CoverCrop\_Z\_rem} + \text{Disturbance\_Z} + \text{CropDiv\_Z} + \text{Cinput\_Z}$   
 $+ (1 \mid \text{Site})$

|                  | Est.  | S.E. | t val. | d.f.   | p        |
|------------------|-------|------|--------|--------|----------|
| (Intercept)      | 3.41  | 0.39 | 8.81   | 103.69 | 3.14e-14 |
| soil_phys_scores | -0.05 | 0.02 | -2.33  | 40.58  | 0.03     |
| soil_iron_scores | 0.07  | 0.02 | 4.95   | 129.00 | 2.29e-06 |
| pH               | -0.08 | 0.05 | -1.61  | 105.06 | 0.11     |
| CoverCrop_Z_rem  | 0.05  | 0.04 | 1.03   | 23.54  | 0.31     |
| Disturbance_Z    | 0.04  | 0.04 | 0.88   | 21.41  | 0.39     |
| CropDiv_Z        | 0.06  | 0.04 | 1.44   | 21.77  | 0.16     |
| Cinput_Z         | -0.03 | 0.05 | -0.71  | 23.22  | 0.49     |

fPOM RF Variable Importance (root MSE of predicted versus permuted):

|                                 |                   |                       |
|---------------------------------|-------------------|-----------------------|
| fPOM_C_stock                    | fPOM_N_stock      | soil_enzyme_scores    |
| 0.195                           | 0.171             | 0.095                 |
| poxC                            | N_AvailabilityMax | N_AvailabilityAverage |
| 0.092                           | 0.090             | 0.086                 |
| ProportionCovercroppedOperation | CBH               | Prop5yr               |
| 0.084                           | 0.078             | 0.078                 |
| N_AvailabilityMin               | N_fraction_stock  | Prop_Cover2017        |
| 0.076                           | 0.075             | 0.075                 |
| soil_nitrogen_scores            | N_AppliedYr       | Pres_AbsJan2018       |
| 0.072                           | 0.071             | 0.067                 |
| DeepTillageFreq                 |                   |                       |
| 0.063                           |                   |                       |

oPOM model with specific management variables:

$\text{logit\_oPOM\_C\_prop} \sim \text{soil\_phys\_scores} + \text{soil\_iron\_scores} + \text{Prop5yr} +$   
 $\text{TillageDepth} + \text{CropDiv\_Z} + \text{Cinput\_Z} + (1 \mid \text{Site})$

FIXED EFFECTS:

|                  | Est.  | S.E. | t val. | d.f.   | p        |
|------------------|-------|------|--------|--------|----------|
| (Intercept)      | -6.90 | 0.31 | -22.24 | 25.70  | 4.21e-10 |
| soil_phys_scores | 0.01  | 0.04 | 0.34   | 36.02  | 0.73     |
| soil_iron_scores | 0.13  | 0.04 | 3.60   | 104.53 | 0.000678 |
| Prop5yr          | 0.40  | 0.46 | 0.86   | 25.64  | 0.40     |
| TillageDepth     | 0.32  | 0.29 | 1.10   | 22.05  | 0.28     |
| CropDiv_Z        | 0.16  | 0.08 | 2.07   | 22.20  | 0.05     |
| Cinput_Z         | -0.10 | 0.07 | -1.47  | 23.63  | 0.15     |

Bulk C model w/ Prop5yr:

FIXED EFFECTS:

|                  | Est.    | S.E.   | t val.   | d.f.    | p      |
|------------------|---------|--------|----------|---------|--------|
| (Intercept)      | 1.0580  | 0.0030 | 358.0558 | 21.5634 | 0.0000 |
| soil_phys_scores | -0.0281 | 0.0075 | -3.7329  | 46.2097 | 0.0005 |

|                  |         |        |         |          |        |
|------------------|---------|--------|---------|----------|--------|
| soil_iron_scores | 0.0047  | 0.0042 | 1.1133  | 128.6745 | 0.2676 |
| pH               | -0.0053 | 0.0041 | -1.2935 | 92.6334  | 0.1990 |
| Prop5yr          | 0.0242  | 0.0075 | 3.2469  | 27.3039  | 0.0031 |
| CropDiv_Z        | 0.0033  | 0.0070 | 0.4653  | 22.7899  | 0.6461 |
| Disturbance_Z    | -0.0053 | 0.0066 | -0.8017 | 23.3423  | 0.4308 |
| Cinput_Z         | 0.0005  | 0.0068 | 0.0788  | 23.6054  | 0.9379 |

#### oPOM Model with N-input

logit oPOM\_C prop ~ soil\_phys\_scores + soil\_iron\_scores + lm df\$N\_AppliedYr.x +  
CoverCrop\_Z\_rem + Disturbance\_Z + CropDiv\_Z + Cinput\_Z + (1 | Site)

#### FIXED EFFECTS:

|                  | Est.  | S.E. | t val. | d.f.   | p    |
|------------------|-------|------|--------|--------|------|
| (Intercept)      | -6.75 | 0.31 | -21.87 | 20.89  | 0.00 |
| soil_phys_scores | 0.03  | 0.04 | 0.61   | 33.52  | 0.54 |
| soil_iron_scores | 0.12  | 0.04 | 3.42   | 100.92 | 0.00 |
| N_AppliedYr      | -0.21 | 0.56 | -0.38  | 20.95  | 0.71 |
| CoverCrop_Z_rem  | 0.06  | 0.09 | 0.62   | 21.12  | 0.54 |
| Disturbance_Z    | 0.04  | 0.07 | 0.56   | 20.83  | 0.58 |
| CropDiv_Z        | 0.16  | 0.09 | 1.75   | 21.47  | 0.09 |
| Cinput_Z         | -0.06 | 0.10 | -0.67  | 23.12  | 0.51 |

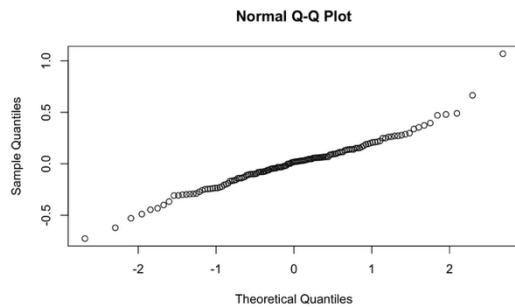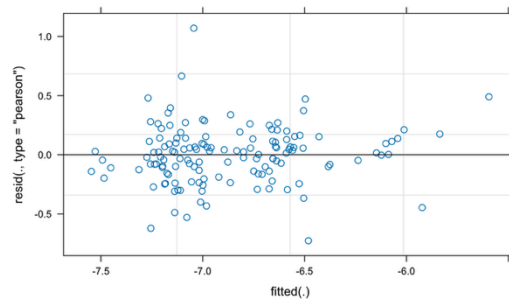

#### fPOM Model with N-input

logit fPOM\_C prop ~ soil\_phys\_scores + soil\_iron\_scores + N\_AppliedYr.x +  
CoverCrop\_Z\_rem + Disturbance\_Z + CropDiv\_Z + Cinput\_Z + (1 | Site)

#### FIXED EFFECTS:

|                  | Est.  | S.E. | t val. | d.f.  | p    |
|------------------|-------|------|--------|-------|------|
| (Intercept)      | -6.14 | 0.39 | -15.78 | 20.89 | 0.00 |
| soil_phys_scores | 0.07  | 0.06 | 1.26   | 31.77 | 0.22 |
| soil_iron_scores | 0.10  | 0.05 | 1.88   | 81.13 | 0.06 |
| N_AppliedYr      | -0.62 | 0.70 | -0.89  | 20.96 | 0.38 |
| CoverCrop_Z_rem  | 0.03  | 0.12 | 0.30   | 21.09 | 0.76 |
| Disturbance_Z    | -0.01 | 0.09 | -0.10  | 20.72 | 0.93 |
| CropDiv_Z        | 0.11  | 0.11 | 1.02   | 21.53 | 0.32 |
| Cinput_Z         | -0.07 | 0.12 | -0.55  | 23.32 | 0.59 |

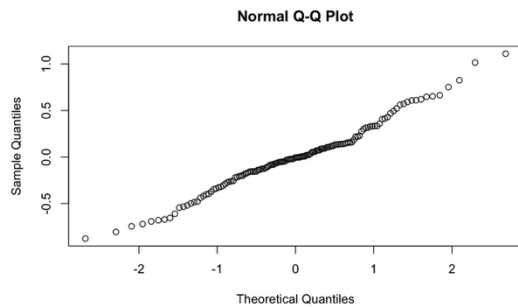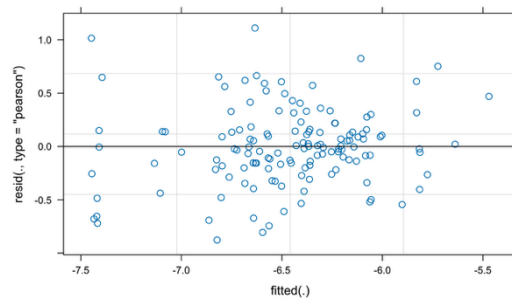

### Yield Model showing Compost input as significant

standardized\_yield ~ soil\_phys\_scores + soil\_iron\_scores + CoverCrop\_Z\_rem +  
Disturbance\_Z + CropDiv\_Z + Cinput\_Z + (1 | Site)

### FIXED EFFECTS:

|                  | Est.  | S.E. | t val. | d.f.  | p        |
|------------------|-------|------|--------|-------|----------|
| (Intercept)      | 0.46  | 0.03 | 13.52  | 21.70 | 4.82e-12 |
| soil_phys_scores | 0.01  | 0.02 | 0.37   | 34.17 | 0.71     |
| soil_iron_scores | -0.05 | 0.02 | -2.63  | 95.94 | 0.01004  |
| CoverCrop_Z_rem  | 0.05  | 0.04 | 1.14   | 24.36 | 0.27     |
| Disturbance_Z    | -0.01 | 0.04 | -0.28  | 21.95 | 0.78     |
| CropDiv_Z        | -0.10 | 0.04 | -2.57  | 22.31 | 0.02     |
| Cinput_Z         | 0.15  | 0.04 | 3.62   | 24.03 | 0.00138  |

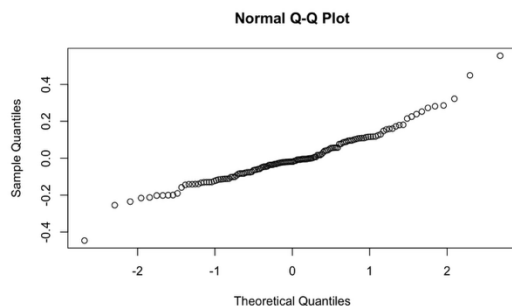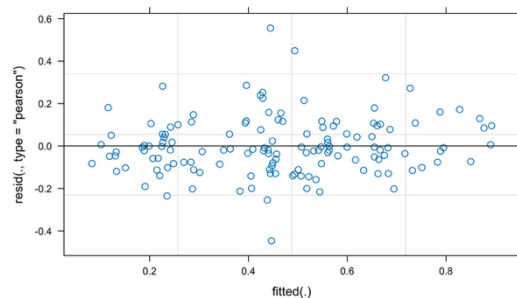

### oPOM and fPOM stock models:

When we run the same model structures for fPOM and oPOM stocks rather than carbon proportion values, the results for oPOM differ slightly in that soil physical characteristics are significant. fPOM results remain unchanged in terms of which variables are significant. In the case of oPOM, we find that the oPOM stock increases slightly with sandier soils because they will have less carbon in the MAOM fraction, which dominates the overall carbon stock across all samples.

log(oPOM\_C\_stock) ~ soil\_phys\_scores + soil\_iron\_scores + pH +  
CoverCrop\_Z\_rem + Disturbance\_Z + CropDiv\_Z + Cinput\_Z + (1 | Site)

### FIXED EFFECTS:

|             | Est. | S.E. | t val. | d.f.  | p    |
|-------------|------|------|--------|-------|------|
| (Intercept) | 0.55 | 0.82 | 0.67   | 55.66 | 0.51 |

|                  |       |      |       |       |        |
|------------------|-------|------|-------|-------|--------|
| soil_phys_scores | 0.09  | 0.04 | 2.13  | 31.94 | 0.04   |
| soil_iron_scores | 0.14  | 0.04 | 3.86  | 94.38 | 0.0002 |
| pH               | -0.03 | 0.11 | -0.28 | 56.00 | 0.78   |
| CoverCrop_Z_rem  | 0.07  | 0.07 | 0.96  | 22.62 | 0.35   |
| Disturbance_Z    | 0.04  | 0.07 | 0.56  | 20.42 | 0.58   |
| CropDiv_Z        | 0.15  | 0.07 | 2.13  | 21.08 | 0.04   |
| Cinput_Z         | -0.07 | 0.08 | -0.95 | 22.63 | 0.35   |

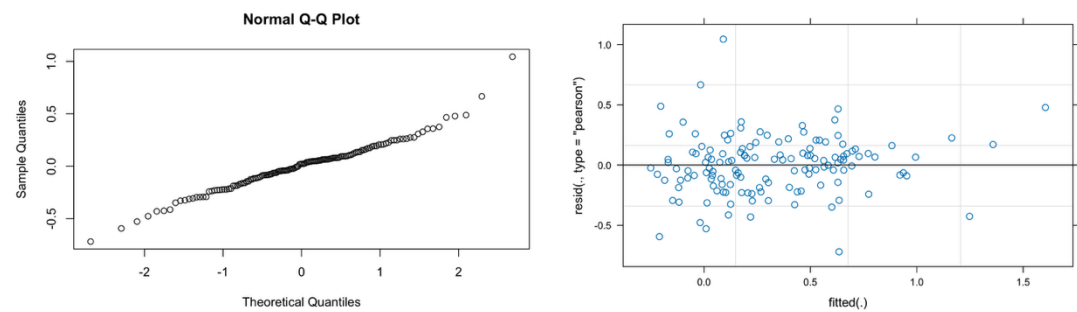

|                  |                  |          |                 |               |
|------------------|------------------|----------|-----------------|---------------|
| soil_phys_scores | soil_iron_scores | pH       | CoverCrop_Z_rem | Disturbance_Z |
| 1.667712         | 1.427696         | 1.102020 | 1.460060        | 1.186524      |
| CropDiv_Z        | Cinput_Z         |          |                 |               |
| 1.386764         | 1.575725         |          |                 |               |

log(fPOM C stock)~ soil\_phys\_scores + soil\_iron\_scores + pH +  
 Prop5yr + DeepTillageFreq + CropDiv\_Z + Cinput\_Z + (1 | Site)

FIXED EFFECTS:

|                  | Est.  | S.E. | t val. | d.f.  | p    |
|------------------|-------|------|--------|-------|------|
| (Intercept)      | -0.39 | 1.02 | -0.38  | 35.68 | 0.71 |
| soil_phys_scores | 0.07  | 0.05 | 1.39   | 32.81 | 0.17 |
| soil_iron_scores | 0.09  | 0.05 | 1.84   | 70.27 | 0.07 |
| pH               | 0.02  | 0.13 | 0.16   | 40.35 | 0.87 |
| Prop5yr          | 1.42  | 0.52 | 2.75   | 24.65 | 0.01 |
| DeepTillageFreq  | -0.48 | 0.18 | -2.61  | 20.83 | 0.02 |
| CropDiv_Z        | -0.01 | 0.09 | -0.10  | 22.11 | 0.92 |
| Cinput_Z         | -0.01 | 0.08 | -0.16  | 23.04 | 0.88 |

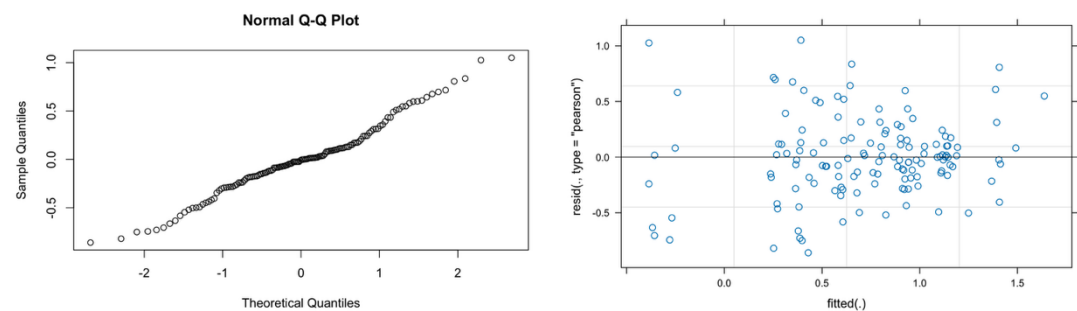

|                  |                  |          |          |                 |
|------------------|------------------|----------|----------|-----------------|
| soil_phys_scores | soil_iron_scores | pH       | Prop5yr  | DeepTillageFreq |
| 2.275531         | 1.730738         | 1.125883 | 1.844375 | 1.398467        |
| CropDiv_Z        | Cinput_Z         |          |          |                 |

**Barriers and Incentives for Diversified Practices - V4**

**Survey Flow**

Standard: Introduction (8 Questions)  
Standard: Soil amendments and fertilizers intro (1 Question)  
Standard: Soil amendment and fertilizer open-ended loop (9 Questions)  
Standard: Cover crops (11 Questions)  
Standard: Crop rotation (8 Questions)  
Standard: Tillage (11 Questions)  
Standard: Irrigation (11 Questions)  
Standard: Other Fields (2 Questions)  
Standard: Compost Social Qs (8 Questions)  
Standard: Cover cropping social Qs (7 Questions)  
Standard: Crop rotation social qs (6 Questions)  
Standard: Irrigation Social Qs (4 Questions)  
Standard: Conclusions (8 Questions)

Page Break

---

**Start of Block: Introduction**

Q1 Dear Participant, Thank you for working with us. We are a team of researchers from the Department of Environmental Science, Policy, and Management at the University of California, Berkeley. We are studying farms growing lettuce in the Central Coast region. As you may recall, you have been in touch with Jennifer Thompson about the field sampling we are currently conducting. This soil science sampling will look at the diversity and number of microbes in your soil, the amount of soil carbon, the amount of water your soil can hold, and levels of various nutrients. **This questionnaire asks about practices that take place on the specific field we are sampling** so that we can learn how they impact the soil measurements we are taking, and share that information back with you. **Your study data will be handled confidentially.** If results of this study are published or presented, individual names and other personally identifiable information will not be used. Participation in research is completely voluntary. You may decline to participate or to withdraw at any point in this study. If you have any questions or concerns about this study, you may contact Tim Bowles, project team leader: [timothy.bowles@berkeley.edu](mailto:timothy.bowles@berkeley.edu); 510-642-5277. Clicking the “Next” button indicates that you have read and understood the above information, and that **you agree to participate in this survey.**

---

Page Break

---

Q2

**You may close the survey at any time and your progress and responses will be saved.** You can later return to where you left off by using the same URL link. You can also use the 'back' arrow if you need to view or revise previous responses.

Q3 Name of farm operation?

---

Q4 Which of the following best describes your role(s) in this operation?

☐

Farm owner/operator (3)

☐

Farm/ranch manager (2)

☐

Crop adviser (1)

☐

Other (4) \_\_\_\_\_

*Display this question:*

*If Q4 = Farm owner/operator*

Q5 As the owner of the farm, do you oversee the production decisions?

☐

Yes (1)

☐

No (2)

Page Break

Q6 We emailed you a map of the field where we will do soil sampling. We would like you to answer the following questions as they pertain to the field that is marked with a pin. Will you answer the questions based on the field that is marked with a pin?

- ☐ Yes (4)
- ☐ No (5)
- ☐ I'm not sure which field this is (6)

---

*Display this question:*

*If Q6 = I'm not sure which field this is*

Q7 Please pause the survey and contact Jennifer Thompson ([jbthompson@berkeley.edu](mailto:jbthompson@berkeley.edu)) to discuss the field location. You can return to the survey later using the same URL link.

---

Page Break

Q8 How long has this field been in production under the management of your farm business?

- ☐ Less than a year (1)
- ☐ 1-5 years (2)
- ☐ 5-10 years (3)
- ☐ 11-15 years (4)
- ☐ More than 15 years (5)
- ☐ Not sure (6)

**End of Block: Introduction**

---

**Start of Block: Soil amendments and fertilizers intro**



## Q9 Soil Amendments and Fertilizer.

The next set of questions ask about the soil amendments and fertilizers you use. You will be asked about these amendments or fertilizers one at a time, until you indicate that you have described all of your amendments and fertilizers. When answering these questions, **please consider all different types of amendments or fertilizers that you use**, including for example: plant-based compost, composted manure, chicken manure (pelletized), fertilizer blends, bone/blood/feather meal, seabird/bat guano, compost tea. We will use this information to assess the relationship between management techniques, soil health outcomes, and yields. Note: You may close the survey at any time and your progress and responses will be saved. You can later return to where you left off by using the same URL link.

End of Block: Soil amendments and fertilizers intro

---

Start of Block: Soil amendment and fertilizer open-ended loop

*Display this question:*

*If Loop all: Q10 != No*

*And Loop 1: , Not Current Loop*

Q10 Do you have another soil amendment or fertilizer that you use in this field?

☐ Yes (1)

☐ No (2)

---

Page Break

---

*Display this question:*

*If Loop all: Q10 != No*

Q11 Please give the full product name of a soil amendment or fertilizer you use, if possible. *For example, "Nutri-Rich 4-3-2 Fertilizer Pellets."*

---

---

Page Break

---

*Display this question:*

*If Loop all: Q10 != No*

Q12 Have you or will you use \${Q11/ChoiceTextEntryValue} in this field for the current lettuce crop (Fall 2019 - Summer 2020)?

☐

Yes (1)

☐

No (2)

☐

Not sure (4)

*Skip To: End of Block If Q12 = No*

*Display this question:*

*If Loop all: Q10 != No*

Q13 How much \${Q11/ChoiceTextEntryValue} per acre did you/will you apply to this field (fall 2019-summer 2020)? Enter according to whichever units you normally use. You only need to enter one line.

\_\_\_\_\_ tons/acre (1)

\_\_\_\_\_ pounds/acre (2)

\_\_\_\_\_ other units (for example, pounds-N/acre) (please specify units) (3)

Page Break

*Display this question:*

*If Loop all: Q10 != No*

Q14 How often do you apply \${Q11/ChoiceTextEntryValue} to this field?

- ☐ Twice per year or more (2)
- ☐ Once per year (1)
- ☐ Every other year (3)
- ☐ Every few years (4)
- ☐ Every five years or less (5)
- ☐ Never (6)

---

Page Break

*Display this question:*

*If Loop all: Q10 != No*

Q15 When did you (or will you) apply \${Q11/ChoiceTextEntryValue} to this field?

- ☐ In the fall prior to this lettuce crop (1)
- ☐ Weeks or days before planting this lettuce crop (2)
- ☐ At planting or shortly after planting the lettuce crop (3)
- ☐ Close to lettuce thinning or another time while lettuce is growing (4)
- ☐ After lettuce harvest (5)
- ☐ Other (please specify) (6) \_\_\_\_\_

---

Page Break

*Display this question:*

*If Loop all: Q10 != No*

Q16 How do you apply the \${Q11/ChoiceTextEntryValue} to this field?

☐

Banded application (1)

☐

Broadcast application (2)

☐

Incorporated into soil (3)

☐

Fertigation/ in irrigation water (4)

☐

Other (please specify) (5) \_\_\_\_\_

---

Page Break

*Display this question:*

*If Loop all: Q10 != No*

Q17 What source/brand do you use for \${Q11/ChoiceTextEntryValue}?

\_\_\_\_\_

*Display this question:*

*If Loop all: Q10 != No*

Q18 What is the N-P-K for this brand/source of \${Q11/ChoiceTextEntryValue}? *If you are unsure, please leave blank or give your best estimate.*

\_\_\_\_\_

---

Page Break

**End of Block: Soil amendment and fertilizer open-ended loop**

**Start of Block: Cover crops**

Q19

**Cover Crops.** The following questions ask about whether and how you use cover crops in the field we are sampling.

Note: You may close the survey at any time and your progress and responses will be saved. You can later return to where you left off by using the same URL link.

---

Page Break

Q20 Does your farm operation practice cover cropping?

- ☐ Yes, we currently practice cover cropping (3)
- ☐ No, not currently, but we have practiced cover cropping in the past (2)
- ☐ No, we have never practiced cover cropping (1)
- ☐ Don't know (5)

*Skip To: End of Block If Q20 = No, we have never practiced cover cropping*

*Skip To: End of Block If Q20 = No, not currently, but we have practiced cover cropping in the past*

Q21 Have cover crops been planted in this field during the following years? In the write in, please describe what species were planted.

- ☐ 2019 (1) \_\_\_\_\_
- ☐ 2018 (2) \_\_\_\_\_
- ☐ 2017 (3) \_\_\_\_\_
- ☐ 2016 (4) \_\_\_\_\_
- ☐ Prior to 2016 (Please indicate if you have used cover crops in the years before 2016) (5)  
\_\_\_\_\_

---

*Display this question:*

*If Q21 = 2019*

Q22 When was the planting date for the winter cover crop in 2019/2020?

---

---

Page Break

Q23 Will you plant a cover crop in this field next winter (2020/2021)?

☐ Yes (1)

☐ No (2)

---

Q24 Will you plant a summer cover crop this year (2020)?

☐ Yes (1)

☐ No (2)

---

*Display this question:*

*If Q24 = Yes*

Q25 When is the planting date for the summer cover crop?

---

---

*Display this question:*

*If Q23 = Yes*

*Or Q24 = Yes*

Q26 What seed mix or species of cover crop do you plan to plant this summer (2020) or winter (2020/2021)?

---

---

---

---

---

-----

Q27 What is the seeding rate you use?

---

-----

Page Break

---

Q28 During which month do you typically incorporate the cover crop back into the soil (for the winter 2019/2020 cover crop)?

- ☐ January (1)
- ☐ February (2)
- ☐ March (3)
- ☐ April (4)
- ☐ May (5)
- ☐ June (6)
- ☐ July (7)
- ☐ August (8)
- ☐ September (9)
- ☐ October (10)
- ☐ November (11)
- ☐ December (12)

---

*Display this question:*

*If Q20 = Yes, we currently practice cover cropping*

Q29 How much of your lettuce field acreage is planted with a cover crop each season?

0 10 20 30 40 50 60 70 80 90 100

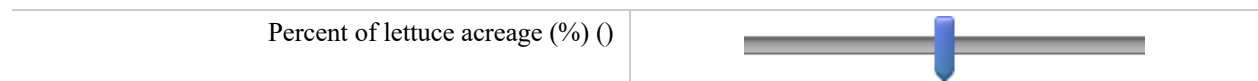

---

End of Block: Cover crops

Start of Block: Crop rotation



Q30

**Crop Rotation.** The following questions ask about the history of crops planted in the field we are sampling. These questions refer to the planting history for this field over the past 5 years.

**Please use records of your cropping plan history to answer these questions.** If records are not available, please answer to your best recollection.

Note: You may close the survey at any time and your progress and responses will be saved. You can later return to where you left off by using the same URL link.

-----  
Page Break

Q31 When (what date) was lettuce planted in this field during this season?

\_\_\_\_\_

-----

Q32 Will you plant more than one lettuce crop in this field this season?

☐ Yes (1)

☐ No (3)

-----  
Page Break

Q33 Does your farm operation seasonally rotate other crops or land uses in between lettuce plantings?

- ☐ Yes, we currently rotate other crops with our lettuce (3)
- ☐ No, not currently, but we have rotated other crops with our lettuce in the past (2)
- ☐ No, we do not rotate other crops with our lettuce (1)
- ☐ We sublease to another operation that plants crops other than lettuce (4)
- ☐ Not sure (5)

---

*Display this question:*

*If Q33 = Yes, we currently rotate other crops with our lettuce*

*Or Q33 = We sublease to another operation that plants crops other than lettuce*

Q34 How often would you say your farm operation/ or sublease operation rotates other crops in between your lettuce plantings?

- ☐ We rotate other crops or land uses in between each lettuce planting (1)
- ☐ We rotate other crops or land uses in between every two lettuce plantings (2)
- ☐ We rotate other crops or land uses in between every three or more lettuce plantings (3)
- ☐ Depends on the prices for different crops (4)
- ☐ Don't know (5)

---

*Display this question:*

*If Q32 != Yes*

*And Q32 != No*

Q35 What crops were planted in this field for the past five years? *(include fallow periods)*. If you grew multiple crops per season, please list them in the order they were planted. An example entry could be: 2019 lettuce to

*broccoli, 2018 lettuce and carrots to celery and onions, 2017 lettuce to strawberry, 2016 lettuce to kale and broccoli, 2015 fallow, etc.).*

☐ 2019 (1) \_\_\_\_\_

☐ 2018 (2) \_\_\_\_\_

☐ 2017 (3) \_\_\_\_\_

☐ 2016 (4) \_\_\_\_\_

☐ 2015 (5) \_\_\_\_\_

-----

Q36 What crops were planted in this field or block for the past five years? If you grew multiple crops in a given year, please list them in the order they were planted. If you grew multiple crops per field at the same time, please list them all in the same box. For example, “lettuce, chard, carrots.” If the field/block was not planted with a crop for sale, please describe how it was used, for example, “cover crop” or “fallow.”

|           | 1st crop(s) (1) | 2nd crop(s) (2) | 3rd crop(s) (3) |
|-----------|-----------------|-----------------|-----------------|
| 2019 (6)  |                 |                 |                 |
| 2018 (7)  |                 |                 |                 |
| 2017 (8)  |                 |                 |                 |
| 2016 (9)  |                 |                 |                 |
| 2015 (10) |                 |                 |                 |

-----

Q37 What will likely be planted in this field next, after this lettuce crop has been harvested? *For example, another food crop, a cover crop, or left fallow.*

---



---



---



---



---

End of Block: Crop rotation

---

Start of Block: Tillage

Q38

**Tillage.** The following questions ask about your tillage management.

Note: You may close the survey at any time and your progress and responses will be saved. You can later return to where you left off by using the same URL link.

---

Page Break

---

Q39 Do you till the soil for lettuce production?

☐ Yes (1)

☐ No (2)

*Skip To: End of Block If Q39 = No*

---

Q40 Do you use deep tillage (greater than 12 inches deep)?

☐ Yes (1)

☐ No (2)

---

*Display this question:*

*If Q40 = Yes*

Q41 How often do you use deep tillage?

- ☐ More than once per year (1)
- ☐ Once per year (2)
- ☐ Once every two years (3)
- ☐ Once every few years (4)
- ☐ Once every five years or less (5)
- ☐ Not sure (6)

---

*Display this question:*

*If Q40 = Yes*

Q42 What was the last year deep tillage was used on this field?

- ☐ 2019 (4)
- ☐ 2018 (5)
- ☐ 2017 (6)
- ☐ 2016 (7)
- ☐ 2015 or before (8)

---

*Display this question:*

*If Q40 = Yes*

Q43 During what month do you typically do deep tillage in this field?

- ☐ January (4)
- ☐ February (5)
- ☐ March (6)
- ☐ April (7)
- ☐ May (8)
- ☐ June (9)
- ☐ July (10)
- ☐ August (11)
- ☐ September (12)
- ☐ October (13)
- ☐ November (14)
- ☐ December (15)

---

*Display this question:*

*If Q40 = Yes*

Q44 How many inches deep is tilled during deep tillage?

\_\_\_\_\_ inches (4)

---

*Display this question:*

*If Q40 = Yes*

Q45 What percent of the field is tilled during deep tillage?

0 10 20 30 40 50 60 70 80 90 100

|                                    |                                                                                    |
|------------------------------------|------------------------------------------------------------------------------------|
| Percent (%) of the field tilled () |  |
|------------------------------------|------------------------------------------------------------------------------------|

Q46 Please use the text box below to describe how you till (other than deep ripping).

**Please include:** How often, how deep, and when you till, and also describe how you prepare the beds.

---

---

---

---

---

Page Break

Q47 What are the main goals of the tillage?

- ☐ Weed control (1)
- ☐ Bed preparation (2)
- ☐ Other (please specify) (3) \_\_\_\_\_



Q48 How long do you keep the beds in place once they are formed?

- ☐ Only one season (1)
- ☐ 2-3 seasons (2)
- ☐ 4-5 seasons (3)
- ☐ 6 or more seasons (4)

---

Page Break

End of Block: Tillage

Start of Block: Irrigation

Q49

**Irrigation.** The following questions ask about your irrigation management.

Note: You may close the survey at any time and your progress and responses will be saved. You can later return to where you left off by using the same URL link.

---

Page Break

Q50 How many inches of water did you apply before planting lettuce in this field (in total)? *Please refer to your Fall 2019 - Summer 2020 irrigation.*

\_\_\_\_\_ inches of irrigation water (4)

---

Page Break

Q51 What type of **preseason/transplant** irrigation system do you use? *Select all that apply.*

☐

Furrow (1)

☐

Sprinkler (2)

☐

Surface drip (3)

☐

Sub-surface drip (4)

---

Q52 What type of **growing season** irrigation system do you use? *Select all that apply.*

☐

Furrow (1)

☐

Sprinkler (2)

☐

Surface drip (3)

☐

Sub-surface drip (4)

---

Page Break

*Display this question:*

*If Q52 = Sub-surface drip*

Q53 For sub-surface drip irrigation, how deep are the lines in inches?

\_\_\_\_\_ inches (4)

---

*Display this question:*

*If Q52 = Surface drip*

*Or Q52 = Sub-surface drip*

Q54 For drip irrigation, how many lines are there per bed?

- ☐ 1 (4)
- ☐ 2 (7)
- ☐ 3 (8)
- ☐ 4 or more (9)

---

Page Break

Q55 How many inches of water do you apply during the growing season (after planting) in total?

\_\_\_\_\_ inches (4)

Q56 How often did you (or will you) irrigate during the growing season this year?

- ☐ Daily (1)
- ☐ Every few days (2)
- ☐ Weekly (3)
- ☐ Every few weeks (4)

---

Page Break

Q57 Do you add chlorine to the irrigation water?

- ☐ Yes, both preseason and during growing season (1)
- ☐ Yes, during preseason only (2)
- ☐ Yes, during production only (3)
- ☐ No (4)

---

*Display this question:*

*If Q57 != No*

Q58 Why do you add chlorine to the irrigation water? *Select all that apply.*

- ☐ Concern for food safety (1)
- ☐ Mandated by buyers (2)
- ☐ Neighboring farms do this (3)
- ☐ Extension staff recommend it (4)
- ☐ Other (please specify) (5) \_\_\_\_\_

---

*Display this question:*

*If Q57 != No*

Q59 For how many years have you been adding chlorine to the irrigation water?

\_\_\_\_\_ years (4)

End of Block: Irrigation

---

Start of Block: Other Fields

Q60 If you have multiple blocks or fields of lettuce, do you manage them similarly? *For example, do you use similar practices (e.g. cover cropping, crop rotations) and similar levels of inputs (e.g. water, fertilizer) for all of your lettuce blocks or fields?*

- ☐ Yes (1)
- ☐ No (2)
- ☐ Not sure (3)
- ☐ Don't have multiple fields/blocks of lettuce (4)

Display this question:

If Q60 != Yes

Or Q60 != Don't have multiple fields/blocks of lettuce

Q61 Could you please indicate the degree to which your management practices for this field differ from your management practices for other fields that you operate?

|                                    | No difference (1)     | Small difference (2)  | Large difference (3)  |
|------------------------------------|-----------------------|-----------------------|-----------------------|
| Soil amendments or fertilizers (4) | <input type="radio"/> | <input type="radio"/> | <input type="radio"/> |
| Cover crops (5)                    | <input type="radio"/> | <input type="radio"/> | <input type="radio"/> |
| Crop rotation (6)                  | <input type="radio"/> | <input type="radio"/> | <input type="radio"/> |
| Tillage (7)                        | <input type="radio"/> | <input type="radio"/> | <input type="radio"/> |
| Irrigation (8)                     | <input type="radio"/> | <input type="radio"/> | <input type="radio"/> |
| Other (9)                          | <input type="radio"/> | <input type="radio"/> | <input type="radio"/> |

End of Block: Other Fields

Start of Block: Compost Social Qs

**Q62 Incentives and Barriers.** In this section, we will ask about the incentives and barriers that you consider when deciding if and how to use these management practices.

Note: You may close the survey at any time and your progress and responses will be saved. You can later return to where you left off by using the same URL link.

---

Page Break

*Display this question:*

*If If Have you or will you use compost in this field for the current lettuce crop (Fall 2019 - Summer 2... No compost used Is Selected*

**Q63** You previously responded that your farm does not currently use compost. Has your farm operation ever used compost in the past?

☐

Yes, we have used compost within the last 5 years (1)

☐

Yes, but not within the last 5 years (2)

☐

No, we have never used any type of compost (3)

☐

Don't know (4)

---

Page Break

*Display this question:*

*If If Have you or will you use compost in this field for the current lettuce crop (Fall 2019 - Summer 2... No compost used Is Selected*

Q64 Would your farm operation ever consider adopting compost as a regular practice?

- ☐ Yes (1)
- ☐ No (2)
- ☐ Don't know (4)

---

Page Break

*Display this question:*

*If If Have you or will you use compost in this field for the current lettuce crop (Fall 2019 - Summer 2... No compost used Is Not Selected*

Q65 Which of the following statements best captures your farm operation's current attitude toward compost?

- ☐ We would use more compost if we could (1)
- ☐ We are satisfied with the amount of compost we use, and would neither increase nor decrease use (2)
- ☐ We are planning to scale back our use of compost next season (3)
- ☐ Decline to answer (4)
- ☐ Don't know (5)

---

Page Break

Q66 To what extent do each of the following pose a challenge to using compost on your farm?



|                                                                                      | Major challenge (1)   | Minor challenge (2)   | Not a challenge (3)   |
|--------------------------------------------------------------------------------------|-----------------------|-----------------------|-----------------------|
| Cost to purchase (1)                                                                 | <input type="radio"/> | <input type="radio"/> | <input type="radio"/> |
| Cost to haul and/or spread (2)                                                       | <input type="radio"/> | <input type="radio"/> | <input type="radio"/> |
| Nutrients release too slowly (3)                                                     | <input type="radio"/> | <input type="radio"/> | <input type="radio"/> |
| Nutrient concentration is too low or imprecise (4)                                   | <input type="radio"/> | <input type="radio"/> | <input type="radio"/> |
| Food safety concerns (5)                                                             | <input type="radio"/> | <input type="radio"/> | <input type="radio"/> |
| Difficulty storing before spreading (6)                                              | <input type="radio"/> | <input type="radio"/> | <input type="radio"/> |
| Compost quality is too unpredictable (7)                                             | <input type="radio"/> | <input type="radio"/> | <input type="radio"/> |
| Heavy metal or phosphorous accumulation in soils (8)                                 | <input type="radio"/> | <input type="radio"/> | <input type="radio"/> |
| Can spread contaminants to farm (pesticides, herbicides, weed seeds, diseases) (9)   | <input type="radio"/> | <input type="radio"/> | <input type="radio"/> |
| Cannot recoup long-term benefits because lease tenure is too short or uncertain (10) | <input type="radio"/> | <input type="radio"/> | <input type="radio"/> |
| Product is not consistently available (11)                                           | <input type="radio"/> | <input type="radio"/> | <input type="radio"/> |
| Nutrient leaching into surrounding waterways (12)                                    | <input type="radio"/> | <input type="radio"/> | <input type="radio"/> |
| Buyers won't allow it (13)                                                           | <input type="radio"/> | <input type="radio"/> | <input type="radio"/> |
| Benefits are unclear (14)                                                            | <input type="radio"/> | <input type="radio"/> | <input type="radio"/> |
| Other (please specify) (15)                                                          | <input type="radio"/> | <input type="radio"/> | <input type="radio"/> |



Q67 To what extent would each of the following factors motivate your farm operation to adopt or expand compost use?

|                                                                                            | Major motivator (1)   | Minor motivator (2)   | Not a motivator (3)   |
|--------------------------------------------------------------------------------------------|-----------------------|-----------------------|-----------------------|
| Increased crop yield (1)                                                                   | <input type="radio"/> | <input type="radio"/> | <input type="radio"/> |
| Improved crop quality (2)                                                                  | <input type="radio"/> | <input type="radio"/> | <input type="radio"/> |
| Reduced impact from floods (3)                                                             | <input type="radio"/> | <input type="radio"/> | <input type="radio"/> |
| Improved consistency in production (i.e. reduced adverse effects of extreme weather). (16) | <input type="radio"/> | <input type="radio"/> | <input type="radio"/> |
| Reduced disease (4)                                                                        | <input type="radio"/> | <input type="radio"/> | <input type="radio"/> |
| Reduced pests (5)                                                                          | <input type="radio"/> | <input type="radio"/> | <input type="radio"/> |
| Healthier soil (6)                                                                         | <input type="radio"/> | <input type="radio"/> | <input type="radio"/> |
| Water conservation (7)                                                                     | <input type="radio"/> | <input type="radio"/> | <input type="radio"/> |
| Protect biodiversity (8)                                                                   | <input type="radio"/> | <input type="radio"/> | <input type="radio"/> |
| Attract pollinators (9)                                                                    | <input type="radio"/> | <input type="radio"/> | <input type="radio"/> |
| Attract natural pest predators (10)                                                        | <input type="radio"/> | <input type="radio"/> | <input type="radio"/> |
| Carbon storage (11)                                                                        | <input type="radio"/> | <input type="radio"/> | <input type="radio"/> |
| Incentive payments from government (12)                                                    | <input type="radio"/> | <input type="radio"/> | <input type="radio"/> |
| Buyer demand (13)                                                                          | <input type="radio"/> | <input type="radio"/> | <input type="radio"/> |
| Increased crop prices (14)                                                                 | <input type="radio"/> | <input type="radio"/> | <input type="radio"/> |
| Other (15)                                                                                 | <input type="radio"/> | <input type="radio"/> | <input type="radio"/> |

---

Q68 Are there any challenges you would like to tell us more about pertaining to compost use?

---

---

---

---

---

---

Q69 Are there any innovations you have developed to facilitate the use of compost?

---

---

---

---

---

End of Block: Compost Social Qs

---

Start of Block: Cover cropping social Qs

*Display this question:*

*If Q20 = No, not currently, but we have practiced cover cropping in the past*

*Or Q20 = No, we have never practiced cover cropping*

Q70 You previously responded that your farm does not currently use cover crops. Would your farm operation ever consider adopting cover cropping as a regular practice?

- ☐ Yes (1)
- ☐ No (2)
- ☐ Decline to answer (3)
- ☐ Don't know (4)

---

Page Break

Q71 Which of the following statements best captures your farm operation's current attitude toward cover crops?

- ☐ We would like to plant more cover crops than we are currently planting (1)
- ☐ We are satisfied with our current cover cropping practices, and would neither increase nor decrease the amount of cover cropping that we practice (2)
- ☐ We are planning to scale back the amount of cover cropping that we practice (3)

---

Page Break

Q72 Has the percent of acreage to which you plant a cover crop changed since you began farming?

☐ Yes, we have decreased cover cropping. (Please describe why in the text box). (1)

---

☐ Yes, we have increased cover cropping. (Please describe why in the text box). (2)

---

☐ No, it has stayed the same. (3)

---

Page Break

---



Q73 To what extent do each of the following factors pose a challenge to cover cropping on your farm?

|                                                                          | Major challenge (1)   | Minor challenge (2)   | Not a challenge (3)   |
|--------------------------------------------------------------------------|-----------------------|-----------------------|-----------------------|
| Lack of labor (1)                                                        | <input type="radio"/> | <input type="radio"/> | <input type="radio"/> |
| Uses too much water (2)                                                  | <input type="radio"/> | <input type="radio"/> | <input type="radio"/> |
| Disrupts planting schedule (i.e. hinders spring vegetable planting). (3) | <input type="radio"/> | <input type="radio"/> | <input type="radio"/> |
| Too costly (4)                                                           | <input type="radio"/> | <input type="radio"/> | <input type="radio"/> |
| Too much planning involved (5)                                           | <input type="radio"/> | <input type="radio"/> | <input type="radio"/> |
| No benefit to yields (6)                                                 | <input type="radio"/> | <input type="radio"/> | <input type="radio"/> |
| Leads to weed problems (7)                                               | <input type="radio"/> | <input type="radio"/> | <input type="radio"/> |
| I don't know how to cover crop (8)                                       | <input type="radio"/> | <input type="radio"/> | <input type="radio"/> |
| I don't have access to cover crop seeds (9)                              | <input type="radio"/> | <input type="radio"/> | <input type="radio"/> |
| Buyers don't want it (10)                                                | <input type="radio"/> | <input type="radio"/> | <input type="radio"/> |
| Other (please specify) (11)                                              | <input type="radio"/> | <input type="radio"/> | <input type="radio"/> |

Q74 To what extent would each of the following factors motivate your farm operation to adopt or expand cover cropping?

|                                         | Major motivator (1)   | Minor motivator (2)   | Not a motivator (3)   |
|-----------------------------------------|-----------------------|-----------------------|-----------------------|
| Increased crop yield (1)                | <input type="radio"/> | <input type="radio"/> | <input type="radio"/> |
| Improved crop quality (2)               | <input type="radio"/> | <input type="radio"/> | <input type="radio"/> |
| Reduced impact from floods (3)          | <input type="radio"/> | <input type="radio"/> | <input type="radio"/> |
| Reduced disease (4)                     | <input type="radio"/> | <input type="radio"/> | <input type="radio"/> |
| Reduced pests (5)                       | <input type="radio"/> | <input type="radio"/> | <input type="radio"/> |
| Healthier soil (6)                      | <input type="radio"/> | <input type="radio"/> | <input type="radio"/> |
| Water conservation (7)                  | <input type="radio"/> | <input type="radio"/> | <input type="radio"/> |
| Protect biodiversity (8)                | <input type="radio"/> | <input type="radio"/> | <input type="radio"/> |
| Attract pollinators (9)                 | <input type="radio"/> | <input type="radio"/> | <input type="radio"/> |
| Attract natural pest predators (10)     | <input type="radio"/> | <input type="radio"/> | <input type="radio"/> |
| Carbon storage (11)                     | <input type="radio"/> | <input type="radio"/> | <input type="radio"/> |
| Incentive payments from government (12) | <input type="radio"/> | <input type="radio"/> | <input type="radio"/> |
| Buyer demand (13)                       | <input type="radio"/> | <input type="radio"/> | <input type="radio"/> |
| Increased crop prices (14)              | <input type="radio"/> | <input type="radio"/> | <input type="radio"/> |
| Other (15)                              | <input type="radio"/> | <input type="radio"/> | <input type="radio"/> |

---

Page Break

Q75 Are there any challenges you would like to tell us more about pertaining to cover cropping?

---

---

---

---

---

---

Q76 Are there any innovations or changes to your operation that you have developed to facilitate cover cropping?

---

---

---

---

---

End of Block: Cover cropping social Qs

---

Start of Block: Crop rotation social qs

Q77 Which of the following statements best captures your farm operation's current attitude toward the **frequency** of your crop rotation schedule?

- ☐ We would like to increase the frequency with which we rotate other crops or land uses with our lettuce plantings if we could (1)
- ☐ We are satisfied with the frequency with which we rotate other crops or land uses with our lettuce plantings (2)
- ☐ We plan to reduce the frequency with which we rotate other crops or land uses with our lettuce plantings (3)
- ☐ Don't know (4)

---

Page Break

Q78 Which of the following statements best captures your farm operation's current attitude toward the **diversity** of your crop rotation schedule?

- ☐ We would like to increase the diversity of other crops or land uses that we rotate with our lettuce if we could (1)
- ☐ We are satisfied with the current diversity of other crops or land uses that we rotate with our lettuce (2)
- ☐ We plan to reduce the diversity of other crops or land uses that we rotate with our lettuce (3)
- ☐ Don't know (4)

---

Page Break

Q79 To what extent do each of the following factors pose a challenge to rotating other crops or land uses with lettuce?

|                                                                                                        | Major challenge (1)   | Minor challenge (2)   | No challenge (3)      |
|--------------------------------------------------------------------------------------------------------|-----------------------|-----------------------|-----------------------|
| Lack of market for other crops or products (1)                                                         | <input type="radio"/> | <input type="radio"/> | <input type="radio"/> |
| Labor costs (2)                                                                                        | <input type="radio"/> | <input type="radio"/> | <input type="radio"/> |
| Labor shortages (3)                                                                                    | <input type="radio"/> | <input type="radio"/> | <input type="radio"/> |
| Lack of knowledge on other crops or land uses (4)                                                      | <input type="radio"/> | <input type="radio"/> | <input type="radio"/> |
| Land rents are too high, so need high-value crops (5)                                                  | <input type="radio"/> | <input type="radio"/> | <input type="radio"/> |
| Difficulty finding a sub-letter to plant other crops (6)                                               | <input type="radio"/> | <input type="radio"/> | <input type="radio"/> |
| Lack of technical support (7)                                                                          | <input type="radio"/> | <input type="radio"/> | <input type="radio"/> |
| Food safety causing decreased acreage available for lettuce planting because of proximity to CAFOS (9) | <input type="radio"/> | <input type="radio"/> | <input type="radio"/> |
| Soil conditions are not conducive to other crops (10)                                                  | <input type="radio"/> | <input type="radio"/> | <input type="radio"/> |
| Water limitations for other crops (11)                                                                 | <input type="radio"/> | <input type="radio"/> | <input type="radio"/> |
| Rotations causing disruptions to production schedule (12)                                              | <input type="radio"/> | <input type="radio"/> | <input type="radio"/> |
| Other (8)                                                                                              | <input type="radio"/> | <input type="radio"/> | <input type="radio"/> |

Q80 To what extent would each of the following factors motivate your farm operation to adopt or expand crop rotations?

|                                         | Major motivator (1)   | Minor motivator (2)   | Not a motivator (3)   |
|-----------------------------------------|-----------------------|-----------------------|-----------------------|
| Increased crop yield (1)                | <input type="radio"/> | <input type="radio"/> | <input type="radio"/> |
| Improved crop quality (2)               | <input type="radio"/> | <input type="radio"/> | <input type="radio"/> |
| Reduced impact from floods (3)          | <input type="radio"/> | <input type="radio"/> | <input type="radio"/> |
| Reduced disease (4)                     | <input type="radio"/> | <input type="radio"/> | <input type="radio"/> |
| Reduced pests (5)                       | <input type="radio"/> | <input type="radio"/> | <input type="radio"/> |
| Healthier soil (6)                      | <input type="radio"/> | <input type="radio"/> | <input type="radio"/> |
| Water conservation (7)                  | <input type="radio"/> | <input type="radio"/> | <input type="radio"/> |
| Protect biodiversity (8)                | <input type="radio"/> | <input type="radio"/> | <input type="radio"/> |
| Attract pollinators (9)                 | <input type="radio"/> | <input type="radio"/> | <input type="radio"/> |
| Attract natural pest predators (10)     | <input type="radio"/> | <input type="radio"/> | <input type="radio"/> |
| Carbon storage (11)                     | <input type="radio"/> | <input type="radio"/> | <input type="radio"/> |
| Incentive payments from government (12) | <input type="radio"/> | <input type="radio"/> | <input type="radio"/> |
| Buyer demand (13)                       | <input type="radio"/> | <input type="radio"/> | <input type="radio"/> |
| Increased crop prices (14)              | <input type="radio"/> | <input type="radio"/> | <input type="radio"/> |
| Efficient use of nutrient (16)          | <input type="radio"/> | <input type="radio"/> | <input type="radio"/> |
| Other (15)                              | <input type="radio"/> | <input type="radio"/> | <input type="radio"/> |

---

Page Break

Q81 Are there any challenges you would like to tell us more about pertaining to crop rotations?

---

---

---

---

---

---

Q82 Are there any innovations or changes to your operation that you have developed to facilitate crop rotations?

---

---

---

---

---

End of Block: Crop rotation social qs

---

Start of Block: Irrigation Social Qs



Q83 How satisfied are you with the efficiency of your farm operation's **irrigation system**?

- ☐ Very satisfied (1)
- ☐ Satisfied (2)
- ☐ Neither satisfied nor dissatisfied (3)
- ☐ Dissatisfied (4)
- ☐ Very dissatisfied (5)

Q84 To what extent do each of the following pose a challenge to improving the efficiency of your irrigation system?

|                                                                           | Major challenge (1)   | Minor challenge (2)   | No challenge (3)      |
|---------------------------------------------------------------------------|-----------------------|-----------------------|-----------------------|
| Better technology does not exist (1)                                      | <input type="radio"/> | <input type="radio"/> | <input type="radio"/> |
| Cost to purchase better technology (2)                                    | <input type="radio"/> | <input type="radio"/> | <input type="radio"/> |
| Not enough water savings to justify expense (3)                           | <input type="radio"/> | <input type="radio"/> | <input type="radio"/> |
| Farm terrain is not suitable for more efficient irrigation technology (4) | <input type="radio"/> | <input type="radio"/> | <input type="radio"/> |
| Crops are not suitable for more efficient irrigation technology (5)       | <input type="radio"/> | <input type="radio"/> | <input type="radio"/> |
| Not enough technical assistance (6)                                       | <input type="radio"/> | <input type="radio"/> | <input type="radio"/> |
| Crop rotation schedule is too variable (7)                                | <input type="radio"/> | <input type="radio"/> | <input type="radio"/> |
| Heavy metal or phosphorous accumulation in soils (8)                      | <input type="radio"/> | <input type="radio"/> | <input type="radio"/> |
| Lease is too short or insecure to justify expense (9)                     | <input type="radio"/> | <input type="radio"/> | <input type="radio"/> |
| Too much plastic waste (i.e. from used drip tape) (10)                    | <input type="radio"/> | <input type="radio"/> | <input type="radio"/> |
| Other (11)                                                                | <input type="radio"/> | <input type="radio"/> | <input type="radio"/> |

-----

Q85 Are there any challenges you would like to tell us more about pertaining to your irrigation system?

---



---



---

---

---

-----

Q86 Are there any innovations or changes to your operation that you have developed to improve your irrigation system that you would like to share with us?

---

---

---

---

---

End of Block: Irrigation Social Qs

---

Start of Block: Conclusions

Q87 These next questions ask about some of the pressures you are facing as a grower. We are interested in these answers so that we can help create research and policy priorities that meet your needs.

-----

Page Break

---

Q88 How much **influence** do buyers and contracts have **over your decisions** about what practices to use in the field?

|                                                                    | A great deal (1)      | A lot (2)             | A moderate amount (3) | A little (4)          | None at all (5)       |
|--------------------------------------------------------------------|-----------------------|-----------------------|-----------------------|-----------------------|-----------------------|
| Do buyers have influence over your practices? (1)                  | <input type="radio"/> |
| Do contract specifications have influence over your practices? (2) | <input type="radio"/> |

*Display this question:*

*If Q88 != Do buyers have influence over your practices? [ None at all ]*

*And Q88 != Do contract specifications have influence over your practices? [ None at all ]*

Q89 Please describe how and from which buyers you experience influence over practices. This could be regarding food safety, sustainability, or other management decisions.

---



---



---



---



---

Page Break

Q90 To what extent has your farming operation experienced any of the following changes as a result of COVID-19?

|                                                                       | No change (1)         | Small change (2)      | Large change (3)      |
|-----------------------------------------------------------------------|-----------------------|-----------------------|-----------------------|
| Decreased demand (1)                                                  | <input type="radio"/> | <input type="radio"/> | <input type="radio"/> |
| Increased demand (2)                                                  | <input type="radio"/> | <input type="radio"/> | <input type="radio"/> |
| Interrupted market access (3)                                         | <input type="radio"/> | <input type="radio"/> | <input type="radio"/> |
| Increased new market access (for example, online or direct sales) (4) | <input type="radio"/> | <input type="radio"/> | <input type="radio"/> |
| Labor shortages due to illness (5)                                    | <input type="radio"/> | <input type="radio"/> | <input type="radio"/> |
| Labor shortages due to worker protection policies (6)                 | <input type="radio"/> | <input type="radio"/> | <input type="radio"/> |
| Labor shortages due to increased demand (7)                           | <input type="radio"/> | <input type="radio"/> | <input type="radio"/> |
| Uncertainty about food safety and COVID-19 (8)                        | <input type="radio"/> | <input type="radio"/> | <input type="radio"/> |
| Unavailability of protective equipment (masks, gloves, etc.) (9)      | <input type="radio"/> | <input type="radio"/> | <input type="radio"/> |
| Decreased access to credit (10)                                       | <input type="radio"/> | <input type="radio"/> | <input type="radio"/> |

Page Break

Q91 Please describe how your farm operation been impacted by COVID-19, including anything not covered in the previous question.

---



---

---

---

---

-----

Q92 Please describe any steps that your farm operation has taken in response to COVID-19.

---

---

---

---

---

-----

Page Break 

---

Q93 What type of soil health research would you like to learn more about? Check all the things you are interested in. If you don't see something you are interested in, please add it in.

☐

Soil microbes (2)

☐

Role of soil for climate change mitigation (3)

☐

Biodiversity and soil health (4)

☐

Soil borne diseases (5)

☐

Cover cropping and soil health (6)

☐

Crop rotations and soil health (7)

☐

Compost applications and soil health (8)

☐

Food safety and soil health (9)

☐

Relationship between human health and soil health (10)

☐

Other (please specify) (11) \_\_\_\_\_

---

Q96 Please enter your mailing address where we can send a \$100 gift in recognition of your participation.

---

---

---

---

---
